# Supplementary material for: In silico prediction aided preparation of antioxidant soybean peptides by enzymatic hydrolysis for ameliorating lead exposure-induced toxicity
Source: Royal Society of Chemistry journal article supplement (doi:10.1039/d3fo04697d), 2024-01-01
Supplement: d3fo04697d1.xlsx [file d3fo04697d1.xlsx]

## Sheet: Table 1
No	Enzyme	7S			11S-G1			11S-G2			11S-G3			11S-G4			11S-G5
		Antioxidative		DHt(%)	Antioxidative		DHt(%)	Antioxidative		DHt(%)	Antioxidative		DHt(%)	Antioxidative		DHt(%)	Antioxidative		DHt(%)
		AE	W		AE	W		AE	W		AE	W		AE	W		AE	W
1	Pepsin	0.0094	0.1825	67.8404	0.0141	0.2686	70.8502	0.0082	0.1657	71.4876	0.0104	0.2276	70.2083	0.0089	0.1319	67.2598	0.0039	0.0718	67.1845
2	Chymotrypsin C	0.007	0.1359	38.0282	0.0141	0.2686	43.3198	0.0082	0.1657	44.4215	0.0125	0.2735	43.125	0.0071	0.1052	43.5943	0.0097	0.1786	43.1068
3	Stem bromelain	0.0047	0.0913	56.5728	0.004	0.0762	46.5587	0.0062	0.1657	48.1405	0.0042	0.0919	48.5417	0.0071	0.1052	46.0854	0.0058	0.1068	48.7379
4	Pancreatic elastase	0.0047	0.0913	53.5211	0.004	0.0762	43.7247	0.0041	0.0828	44.6281	0.0042	0.0919	43.5417	0.0053	0.0785	43.2384	0.0039	0.0718	45.0485
5	Papain	0.0047	0.0913	42.723	0.002	0.0381	41.9028	0.0041	0.0828	42.9752	0.0021	0.046	41.6667	0.0089	0.1319	37.9004	0.0058	0.1068	39.6117
6	Thermolysin	0.0047	0.0913	35.6808	0.002	0.0381	30.5668	0.0062	0.1253	31.8182	0.0021	0.046	32.2917	0.0071	0.1052	27.758	0.0019	0.035	28.1553
7	Subtilisin	0.0047	0.0913	32.1596	0.002	0.0381	25.5061	0.0041	0.0828	26.6529	0.0042	0.0919	27.2917	0.0089	0.1319	27.4021	0.0039	0.0718	28.5437
8	Coccolysin	0.0047	0.0913	28.169	0.004	0.0762	25.7085	0.0082	0.1657	26.2397	0.0042	0.0919	26.875	0.0053	0.0785	21.5302	0.0019	0.035	21.5534
9	Calpain 2	0.0023	0.0447	48.5915	0.002	0.0381	46.3563	0.0021	0.0424	47.1074	0.0021	0.046	46.0417	0.0053	0.0785	46.2633	0.0039	0.0718	46.4078
10	Cathepsin G	0.0023	0.0447	23.2394	0.002	0.0381	17.6113	-	-	-	0.0021	0.046	18.125	0.0036	0.0533	16.726	0.0019	0.035	18.2524
11	Proteinasse K	-	-	-	0.0061	0.1162	32.7935	0.0041	0.0828	32.8512	0.0042	0.0919	33.9583	0.0071	0.1052	31.8505	0.0058	0.1068	33.2039
12	Ficin	-	-	-	0.004	0.0762	40.8907	0.0041	0.0828	39.2562	0.0062	0.1357	40.625	0.0053	0.0785	42.3488	0.0039	0.0718	43.6893
13	Chymase	-	-	-	0.002	0.0381	15.3846	0.0021	0.0424	15.4959	0.0042	0.0919	16.25	0.0036	0.0533	14.5907	0.0019	0.035	15.1456

## Sheet: Figure 1
	Figure 1-ABC
	pH	DH	error	DPPH	error
	1.2	4.00034	0.18	48.2416	0.73728
	1.4	4.22281	0.15	51.9113	1.4923
	1.6	6.44743	0.15	55.1988	1.17697
	1.8	7.11482	0.14	67.0489	1.52968
	2	5.78004	0.15	56.7278	1.47456
	Enzyme	DH	error	DPPH	error
	500	4.44527	0.147	52.0642	2.64508
	1000	6.89235	0.12	67.3547	0.7007
	2000	7.11482	0.135	69.4954	1.6055
	3000	7.33728	0.18	69.2661	0.60682
	4000	7.33728	0.161	71.2538	1.72146
	Time	DH	error	DPPH	error
	1	3.55542	0.12	56.7223	0.72913
	2	7.11482	0.142	68.1782	0.72913
	3	7.7822	0.128	69.292	1.39844
	4	8.00467	0.135	72.4741	1.12788
	5	8.22713	0.142	72.8719	1.4386
	Figure 1-DEF
	pH	DH	error	DPPH	error
	6	4.44527	0.135	58.4767	1.12594
	6.5	6.44743	0.157	62.4898	1.26084
	7	8.67205	0.147	71.1712	0.61833
	7.5	9.5619	0.138	75.6757	0.42557
	8	8.89452	0.185	73.2187	0.42557
	Enzyme	DH	error	DPPH	error
	500	2.88803	0.185	52.5799	1.95019
	1000	5.78004	0.198	65.1925	0.37531
	2000	9.33944	0.186	76.1671	0.65006
	3000	9.78437	0.199	77.8051	0.61833
	4000	10.0068	0.192	78.706	0.61833
	Time	DH	error	DPPH	error
	1	6.66989	0.197	61.4956	0.72913
	2	9.5619	0.159	76.8496	1.04031
	4	12.2315	0.189	82.2593	1.20125
	6	12.6764	0.28	81.782	0.7672
	8	14.4561	0.24	83.2936	1.67064
	Figure 1-GHI
	pH	DH	error	DPPH	error
	6	3.55542	0.141	51.7608	0.86287
	6.5	6.44743	0.138	63.4726	2.70642
	7	8.00467	0.2	69.6151	1.35321
	7.5	8.22713	0.12	71.9902	1.07098
	8	7.7822	0.15	67.7314	1.26084
	Enzyme	DH	error	DPPH	error
	500	2.66557	0.151	52.5799	1.95019
	1000	3.55542	0.2	61.0975	1.10792
	2000	8.00467	0.184	72.0721	0.78982
	3000	8.22713	0.155	72.7273	1.61116
	4000	8.89452	0.142	75.43	0.88588
	Time	DH	error	DPPH	error
	1	6.22497	0.188	61.257	1.07619
	2	8.67205	0.145	72.3946	1.31446
	4	11.7865	0.2	79.7136	1.32882
	6	12.2315	0.185	81.3047	0.7672
	8	13.1213	0.193	82.9753	2.16558

## Sheet: Figure 2
	Figure 2-A
	Enzymatic hydrolysis mode	DH	error
	A	9.5619	0.24
	B	10.6742	0.178
	C	16.6807	0.261
	D	18.2379	0.251
	E	18.0155	0.199
	F	13.3438	0.175
	G	13.7887	0.196
	Figure 2-B
	Enzymatic hydrolysis mode	DPPH	error
	A	76.6255	0.71278
	B	79.177	0.79372
	C	85.8436	0.75433
	D	83.1276	0.62139
	E	83.3745	0.57022
	F	81.9753	0.49383
	G	82.0576	0.37717
	Figure 2-C
	Enzymatic hydrolysis mode	ABTS	error
	A	75.722	0.36955
	B	76.5051	0.52945
	C	83.5536	0.67292
	D	81.8894	0.59346
	E	82.3788	0.38851
	F	79.7357	0.44053
	G	79.6867	0.44861
	Figure 2-D
	Enzymatic hydrolysis mode	Fe3+reduction ability	error
	A	27.5667	0.41633
	B	27.6	0.43589
	C	31.9	0.43589
	D	28.7	0.26458
	E	28.6	0.26458
	F	27.7333	0.55076
	G	27.6667	0.49329
	Figure 2-E
		DPPH	error
	SPI	85.4321	0.65327
	>30K	72.5103	0.37717
	3-30K	74.6502	0.37717
	<3K	90.6996	0.99789
	Vc	97.853	0.425
	Figure 2-F
		ABTS	error
	SPI	83.6775	0.2253
	>30K	76.8437	0.78046
	3-30K	78.6136	0.58997
	<3K	85.1524	0.34062
	Vc	92.9587	0.4539
	Figure 2-G
		Fe3+reduction ability	error
	SPI	29.9667	0.23094
	>30K	28	0.43589
	3-30K	28.4667	0.25166
	<3K	32.2	0.52915
	Vc	75.324	0.41158
	Figure 2-H
	Sample concentration	SPI	error	>30K	error	3-30K	error	<3K	error
	10	43.4234	1.571	40.4204	1.354	42.9129	1.332	48.3183	0.13761
	20	49.5496	1.552	44.4444	1.235	47.4475	1.248	54.3543	1.19782
	30	62.9129	1.423	53.003	1.258	56.9069	1.025	71.3313	0.81984
	40	68.9189	1.584	57.1472	1.335	60.2102	1.006	76.8368	0.57162
	50	70.4204	1.442	57.2072	1.235	63.7237	1.635	80.0901	0.65861

## Sheet: Figure 3
	Figure 3-A
	Days	Control	error	Pb	error	Pb+ASP	error	Pb+Vc	error	Pb+DMSA	error	Pb+Vc+DMSA	error
	0	27.402	0.74504	27.241	0.75325	27.436	0.72494	27.264	0.67973	27.766	0.97949	27.42	0.97297
	6	34.405	0.77778	32.007	0.65442	33.701	0.86241	33.029	0.84002	33.135	0.69164	32.933	0.80324
	12	36.708	0.96511	33.4356	0.7921	35.997	0.99591	34.909	0.71825	35.319	0.75417	35.78	0.99591
	18	38.742	0.78596	34.323	0.82675	37.5311	0.50216	36.273	0.67072	37.01	0.89171	36.972	0.98791
	24	38.771	0.90427	35.1478	1.05809	37.818	0.74064	36.917	0.92053	37.503	0.82468	37.261	0.77114
	30	38.975	0.94774	35.315	0.86323	38.138	0.75416	37.118	0.79061	37.848	0.77375	37.372	0.8984
	Figure 3-B
	Days	Control	error	Pb	error	Pb+ASP	error	Pb+Vc	error	Pb+DMSA	error	Pb+Vc+DMSA	error
	1	43.638	3.05299	57.897	5.27088	45.1197	5.86536	45.5095	5.23545	50.2437	9.49859	50.2742	7.47377
	2	35.5057	4.40538	48.9985	6.56174	35.673	4.96779	35.79	5.17233	43.9944	6.92958	40.8285	7.68752
	3	23.7882	5.09855	38.2821	4.60033	28.3763	7.56067	28.3896	6.2655	30.8924	7.18452	30.6735	6.04276
	4	17.5422	4.78717	29.1705	5.07895	17.7723	5.87188	17.8712	6.06802	22.082	6.59947	20.2096	5.26607
	5	16.2135	4.06271	28.4563	5.65572	16.9044	3.79371	17.1874	4.31691	20.712	5.58932	18.464	5.55441
	Figure 3-C
		Number of virtualplatform crossings	error
	Control	4.1	0.737865
	Pb	1.4	0.843274
	Pb+SP	3.7	0.823273
	Pb+Vc	3.8	0.632456
	Pb+DMSA	2.1	0.875595
	Pb+Vc+DMSA	2.77778	1.20185
	Figure 3-D
		Target time	error
	Control	22.07	2.64114
	Pb	11.827	3.59467
	Pb+SP	20.413	2.08392
	Pb+Vc	20.433	3.61161
	Pb+DMSA	13.826	3.34761
	Pb+Vc+DMSA	18.1556	3.53814

## Sheet: Figure 4
	Figure 4-A
		Liver index	error
	Control	3.86	0.23
	Pb	4.32	0.14
	Pb+ASP	3.89	0.19
	Pb+Vc	3.91	0.19
	Pb+DMSA	3.89	0.29
	Pb+Vc+DMSA	3.89	0.25
	Figure 4-B
		Brain index	error
	Control	1.16	0.06
	Pb	0.91	0.05
	Pb+ASP	1.13	0.07
	Pb+Vc	1.15	0.07
	Pb+DMSA	0.99	0.07
	Pb+Vc+DMSA	1.09	0.04

## Sheet: Figure 5
	Figure 5-A
	Pb content in blood
	Days	Control	error	Pb	error	Pb+ASP	error	Pb+Vc	error	Pb+DMSA	error	Pb+Vc+DMSA	error
	0	0.53538	0.19	0.69038	0.158	0.73338	0.19	0.58638	0.162	0.58988	0.164	0.66088	0.166
	6	0.49388	0.153	2.18238	0.145	1.47538	0.155	1.70388	0.158	1.13988	0.157	1.71388	0.144
	12	0.68388	0.172	2.65488	0.128	1.48188	0.154	1.81988	0.152	1.22138	0.162	1.77688	0.138
	18	0.63838	0.148	2.94388	0.149	1.52988	0.165	2.22588	0.154	1.25188	0.17	2.17188	0.155
	24	0.66688	0.152	3.74388	0.186	1.66288	0.155	2.67638	0.139	1.32538	0.155	2.47138	0.159
	30	0.65788	0.166	3.84388	0.149	1.81488	0.141	2.64188	0.157	1.39338	0.162	2.59338	0.141
	Figure 5-B
	Pb content in feces
	Days	Control	error	Pb	error	Pb+ASP	error	Pb+Vc	error	Pb+DMSA	error	Pb+Vc+DMSA	error
	0	0.53322	0.14	0.57614	0.189	0.58462	0.139	0.53173	0.151	0.56667	0.148	0.56521	0.16
	6	0.58517	0.178	264.186	5.98	406.228	7.45	359.681	6.12	470.112	7.25	351.296	6.18
	12	0.59498	0.14	277.941	5.98	426.974	6.12	370.114	5.11	492.189	7.12	377.629	6.58
	18	0.55128	0.151	292.829	7.12	466.429	7.22	393.448	5.89	516.913	5.68	394.184	6.48
	24	0.58713	0.149	306.888	6.12	470.125	6.98	393.553	7.12	528.671	7.25	385.211	6.25
	30	0.60959	0.152	312.673	6.89	473.412	5.21	412.23	5.89	529.008	6.12	410.242	7.28
	Figure 5-C
	Pb content in urine
	Days	Control	error	Pb	error	Pb+ASP	error	Pb+Vc	error	Pb+DMSA	error	Pb+Vc+DMSA	error
	0	0.58538	0.21	0.64038	0.165	0.69338	0.158	0.63538	0.154	0.64088	0.175	0.67338	0.175
	6	0.55888	0.175	164.688	5.854	235.637	6.122	199.738	7.158	263.387	6.123	215.637	5.668
	12	0.59688	0.158	175.287	4.856	264.637	7.158	236.738	6.225	278.087	4.988	247.238	7.158
	18	0.55688	0.168	182.287	5.128	280.938	6.254	256.488	5.223	300.837	5.446	265.637	6.235
	24	0.59338	0.144	184.387	6.215	298.538	6.332	257.337	6.369	351.988	6.223	266.337	5.558
	30	0.62988	0.185	188.387	6.587	305.087	5.895	261.837	7.228	352.538	5.222	266.488	6.215
	Figure 5-D					Figure 5-E
		Pb content in brain	error				Pb content in liver	error
	Control	0.38	0.17			Control	0.63	0.16
	Pb	3.3	0.15			Pb	12.04	0.17
	Pb+ASP	0.77	0.17			Pb+ASP	4.23	0.09
	Pb+Vc	2.32	0.15			Pb+Vc	8.17	0.09
	Pb+DMSA	0.6	0.1			Pb+DMSA	3.7	0.15
	Pb+Vc+DMSA	2.23	0.09			Pb+Vc+DMSA	8.01	0.18

## Sheet: Figure 6
	Liver	Figure 6-A		Figure 6-B		Figure 6-C		Figure 6-D
		GSH	error	T-SOD	error	CAT	error	MDA	error
	Control	63.1605	0.64823	102.865	2.48868	19.8176	1.68101	9.55988	0.82658
	Pb	39.3032	0.63532	78.2212	4.75669	7.85494	1.29418	17.5597	1.13052
	Pb+ASP	62.2694	1.42345	102.303	2.57912	18.8053	1.19267	9.84957	0.62036
	Pb+Vc	61.9889	1.75789	101.828	1.85611	18.408	0.89225	9.77552	0.54308
	Pb+DMSA	57.9053	0.73676	99.6972	1.57417	16.329	1.57816	13.1201	0.62259
	Pb+Vc+DMSA	57.7911	0.70835	97.4226	2.08391	16.2262	0.75124	13.5617	1.34722
	Brain	Figure 6-E		Figure 6-F		Figure 6-G		Figure 6-H
		GSH	error	T-SOD	error	CAT	error	MDA	error
	Control	41.1052	1.0774	224.371	6.76514	13.0949	0.79203	8.32013	1.18859
	Pb	22.4045	2.32921	172.097	10.8192	6.92517	0.82799	15.9574	1.2275
	Pb+ASP	40.2754	1.5051	226.681	6.25816	12.5479	1.03459	8.92857	1.40589
	Pb+Vc	39.6819	0.81459	217.301	5.55283	12.1224	0.83276	9.14634	1.98024
	Pb+DMSA	41.1078	0.7349	203.889	4.70679	10.1688	1.09098	12.7986	1.27986
	Pb+Vc+DMSA	35.3198	2.84403	203.728	6.46817	10.1829	1.06975	13.0034	0.72653

## Sheet: Figure 7
					Figure 7-D
					peptides	number
					KELELDKF	8
	Figure 7-A				PVNKPGRY	8
		total peptides	antioxidant peptides		LVPEQIRL	8
	Octapeptide	23	14		DVHQKIRH	8
	Nonapeptide	64	34		FNPKPNTL	8
	Decapeptide	119	69		DGELQEGR	8
	Undecapeptide	142	81		LKPQQARL	8
	Dodecapeptide	151	90		IVPEPIPA	8
	Trideceptide	147	110		PVNPPGPF	8
	Tetradeceptide	147	103		KVPPLVVL	8
	Pentapeptide	125	88		QWPPDVHL	8
	Hexadeceptide	99	73		EWVFDGEL	8
	Heptapeptide	71	52		PVPRPPHL	8
	Octadeceptide	76	56		IDDDGIPR	8
	Nineteen	62	45		HPRPHQPHQ	9
	Eicoseptide	29	22		SRHASDEVY	9
	Hexadecanopeptide	33	24		NDDTNRHHG	9
	Dodecopeptide	22	15		NKELELDKF	9
	Others-peptide	30	22		ISKKQIREL	9
					QQQHQYPHR	9
		Figure 7-B	Figure 7-C		GVNTGGAHT	9
	amino acid	total peptides	antioxidant peptides		GSKDNVIRQ	9
	A	1088	758		NLKSAAAPF	9
	D	1286	870		FPFPAPPHF	9
	E	1964	1202		ESEDSELAR	9
	F	489	299		DRHAKVHRF	9
	G	1307	891		IRETAPASE	9
	H	444	349		IPVNKPGAF	9
	I	1286	935		PDNNENLAL	9
	K	1178	814		VLAPPDAHF	9
	L	1349	953		GEPDNVVAF	9
	M	184	126		VSANVLPLL	9
	N	932	617		TATAHNTAA	9
	P	1508	1141		VPFEEAKKF	9
	Q	1207	745		VLPPHFDSE	9
	R	916	540		ALEPDHVVE	9
	S	1047	720		LVNVPLVVQ	9
	T	890	575		LSVEVIAAL	9
	V	1445	1078		VIDGVGHLF	9
	W	181	148		VAPVDAHAK	9
	Y	276	223		VLVYPSQAT	9
					VKELDGPIM	9
					RTDGEAALK	9
					EDLPIPTAY	9
					LVDLNGNHL	9
					LTGAIEAAH	9
					VAPADAHPK	9
					VELDGPIMF	9
					REEELHNLRG	10
					RISSDLKPGM	10
					KPFDELFVDF	10
					REEELKNLRG	10
					VELSKEQIRQ	10
					QDSHQKIRHF	10
					KEQEQKDDRW	10
					LNKELELDKF	10
					AIPVNKPGRY	10
					RPQDRHQKIY	10
					NVAGIAHRAY	10
					IYDDELAERR	10
					LDHHDPIMPY	10
					AGSKDNVIRQ	10
					LAGEKDNVVR	10
					LSSRPPDPHQ	10
					IQIDDDGIPR	10
					AGEVDNVVPQ	10
					NATEAAVEPY	10
					NKLVEIEEKL	10
					NAVFDGELPR	10
					VEISKKVIPE	10
					SSRPVDRHPK	10
					VEISKEVIPA	10
					LPQDRHVKVH	10
					ERVFDGELPE	10
					DINEEELRPF	10
					LAELSEDDIF	10
					SRNELDKIIG	10
					LFEELNNDLF	10
					LSQVPVDVHQ	10
					AISNQGTIPF	10
					LAELSEQDIF	10
					AELDKQAAPQ	10
					PFELPSEEVG	10
					NALEPDHVVE	10
					SRINELVIPF	10
					NGERVFDGEL	10
					DGELQEGPVL	10
					EIYQEDLIPR	10
					DKIRLGDTDL	10
					QFPFPVPPPQ	10
					PFPVPVQPHQ	10
					KGKVGKDTFL	10
					LAELSEDDVF	10
					AIPVNKPGPF	10
					EHLEPNLEPL	10
					SAGEKVKKPF	10
					LEHNRSPGYY	10
					SSIEGAKEPY	10
					HTNPTKPINL	10
					PGSAKDIENL	10
					SPQLENLIDY	10
					KIMENQSEEL	10
					TIIPLPVIKE	10
					LKNDGTLIPL	10
					VAEDELMIIL	10
					ALRVPSGTTY	10
					LPSYSPYPPM	10
					AGKDEDKPDL	10
					APINKIHPHL	10
					SRYPTSKGAL	10
					VVIPTEPPHQ	10
					SATGAIEAAH	10
					IEKNRDKPAQ	10
					KDTAGSPASY	10
					LINEATQGTY	10
					LEDLRIPTAY	10
					ETEGGSIIVL	10
					YLVNPHDHQNL	11
					KEQEQKDDRWH	11
					HRISSDLKPGM	11
					RISSDLKPGMV	11
					RISADLKPGMV	11
					EWERIYDYDVY	11
					ANDAAHKSKDY	11
					LQDSHQKIRHF	11
					FIYDDELAERR	11
					VMDKPNGPVWR	11
					ASGAAQKTKDY	11
					SRPQDRHQKIY	11
					GIIELKGPKQY	11
					LAIPVNKPGRY	11
					RVETGVVKPGM	11
					TIIPLPVIKEL	11
					GGESKPQFNIF	11
					RYPSYPQSQGW	11
					VNPKDHNKPVQ	11
					TEGAELIDSVL	11
					IYDDELAERRL	11
					HYQPQHQYPLR	11
					VNPESQQGSPR	11
					LAIEKDNVVLQ	11
					QRPQDRHQVVH	11
					PFELPSEEVLR	11
					VASLVYPSVLT	11
					VEISKEQIRAL	11
					SEISEDSELLR	11
					KDPNSESRSND	11
					EAISNQGTILF	11
					LAPIDTKPVTH	11
					FDIELQEGVVL	11
					YQEPQESQVLG	11
					IRETQPASELL	11
					SLVNNDDRVSY	11
					SRIELDKGILT	11
					NDLGNPDHVEN	11
					LAIPVNKPGLF	11
					QLIDSHQKILH	11
					AAKDLEDANLL	11
					QSIRPQDRHQK	11
					GRVGEVISRTW	11
					AGIAAQKSVLY	11
					LKVREDENNPF	11
					ASGGAQKTVLY	11
					AWMTDEEFALE	11
					RYEGDEINVLF	11
					FLKNDGTLVPL	11
					PAMRKPQQEED	11
					RLIDLRIPTAY	11
					WDIIPIVPILV	11
					IGENKDAMVGW	11
					LTLPDQEKVLW	11
					KSVSQNVLPLL	11
					ATIAAQKTVLY	11
					GNKLKEIEELL	11
					IRINQHSVFPL	11
					ATITAQKSKLY	11
					GVIEGKMMELL	11
					VVSKNKPLVVQ	11
					TGLGELGQVVL	11
					KDIGADWDILY	11
					SATGAIEAAHA	11
					SPNELDKGIGL	11
					GAIDKAIIAIL	11
					DVIGDPIRNGF	11
					TGLGELGEVVL	11
					AGIAAQKTVLY	11
					AAQKAKETVLY	11
					ASITAQTSVLY	11
					KPIQEEDDVLE	11
					SPRHFDSEVVF	11
					RSIRPQDRHQK	11
					KSSIRPDIVNF	11
					AIKEESEGKLK	11
					GPIGRDPESVL	11
					TAISLDFPALW	11
					NDVYLPRDEAF	11
					VNPDKKKDLLV	11
					DKIRLGDTVLF	11
					ILLPHHADADFL	12
					VYPEKDTGRHHF	12
					HRISSDLKPGMV	12
					ELKDSAADAAKR	12
					KDISEGPPAIKL	12
					DVRDLHEGGIKL	12
					IETWNSQHPELQ	12
					LKPDNRIESEGG	12
					ARDDDVKPDSEL	12
					QLIVVPENPLHL	12
					VYVPRDENFGHL	12
					TIIPLPVIKELY	12
					LLQVSHQKIRHF	12
					RIKEKLPGHHTH	12
					LVVVVGNVVDRY	12
					DELVIVIPTIRN	12
					AAGVKDMLDRHF	12
					LSRPQDRHQKIY	12
					LEVEVEEEDPEL	12
					NSVKINAYPSVD	12
					IETWNPNNKPFQ	12
					DLVGQDITAAAM	12
					PVQNLGSTGLHW	12
					INLVKPDDRDPY	12
					PVVNLASTGLHW	12
					VAIKLPSAPHGL	12
					WGVLAKELDALR	12
					LIEKLIKKLLDA	12
					LELSGLFERAMY	12
					VNVGGAHTEAGY	12
					IRVNGVAPGPVW	12
					LVNTGGAHTEAG	12
					LPHFNSKAIVIL	12
					EVVFDGPLQEGR	12
					LVVLQDPHQKIR	12
					SVAELDPQAARQ	12
					IGINAENNQRNF	12
					VVVPDNNENLRL	12
					AIGINAENNQRN	12
					LVRPQDRHQKVH	12
					QVLQDSHQKIRH	12
					RKPQQEEDDDDE	12
					LSLVNNDDRDSY	12
					VVPESQQGSPRV	12
					RVETEGGSIRVL	12
					LGVINEATQGTY	12
					IFVVDKDFETRV	12
					NNKQELDERARQ	12
					EVVKVEVEDGRV	12
					LNVLENSLPKPY	12
					LRPQDRHQKVHR	12
					NKVVENGTPKPS	12
					LDLVLLPLPSHF	12
					LNIGQTSSPDIY	12
					YIRETQPASENL	12
					TNRGPGGTATAH	12
					KIMVKAREIKDY	12
					SIRINQHSVFPL	12
					EGGIKLPRDVIS	12
					FPFELPPEERGR	12
					FVVVVSGDQVVA	12
					KPVNRIESEGGL	12
					LKVREDENNPFY	12
					FLAPIDTKPQTH	12
					WANVDPTSTIRL	12
					TTVPPHPVQVHT	12
					SWNKFVPKQPNM	12
					AVKVNIPSSLDN	12
					LKDPNSPSRSND	12
					AGEKPNVVRQIE	12
					LVQLNREKDRDF	12
					EYVVIPTEPPHQ	12
					SGIIHKIEETLH	12
					VVSKNKPLVVQF	12
					LEVIARPSRADF	12
					LNEIKPSVVAGF	12
					IVVVWNPRNPLL	12
					VFDGELPEGRVL	12
					SVVNVIPQIPSQ	12
					SRNELDPGIGTI	12
					RVNMSDFLESGL	12
					APHVNPISDEYT	12
					HSVQIKDYVPKY	12
					IGENKDAMDGWF	12
					VSPRHFDSEVVF	12
					AKPEASVTDVDF	12
					VISTIIPLPVIK	12
					TTQVPPPSVQVH	12
					LAVSGKPNTQGF	12
					TLAIPVPKPGRF	12
					RAEKDLKDIKELY	13
					NRNGLHLPSYSPY	13
					QDVRDLHEGGIKL	13
					LKPDNRIESEGGL	13
					LKPDNRIESEGGF	13
					LREDGTLKPVAIE	13
					AAAAKHHLAEAAE	13
					VWFPQPAPKDHPW	13
					LEATKPTLPFPWL	13
					VVGVNEHEYKPEL	13
					QQLQDSHQKIRHF	13
					ERIKEKLPGHHTH	13
					SSRPQDRHQKIYN	13
					QSSRPQDRHQKIY	13
					AYEEIYQEDLIKR	13
					RHNIGQTSSPDIY	13
					FNSNKINAYPSVD	13
					KNSWGEDWGEDGY	13
					QLETAAGAAIRFF	13
					VPVLVDLNGNHLW	13
					SPHWNLNANSVIY	13
					NSNKINAYPSVDL	13
					LPVQNDGSTGLHW	13
					GVNTGGAHTEAGY	13
					AIPVNKPGRYDDF	13
					GEEVKVVVPESVL	13
					HFIVPELGPDVNF	13
					KPNLEADHIPTWL	13
					LIETWNPNNKPFQ	13
					ETGVVKPGMVVTF	13
					GINTGGAHTEAGY	13
					SVIVEISKEQIRA	13
					NKRVPQLENLVDY	13
					QQQLPDSHQKIRH	13
					SSRVTISSEDKPF	13
					DSAPPKIMDKARE	13
					EGKDEDEEEEGHM	13
					AIGINAENNQVNF	13
					IFEEDPDFETVVE	13
					NQRSPQLQNLVDY	13
					GSVDNVISQIPSQ	13
					RQNIGQNSSPDIY	13
					YVVNPDNNENLRL	13
					QVPVLVDLNGNHL	13
					LAGEPDNVVRQIE	13
					DGKGERKEHDVIY	13
					LEEVPKKKMEKEL	13
					AQGRINEATQGAY	13
					IGINAENNQRNFL	13
					VNPESQQGSPVVK	13
					QRPVPRHQKVHRF	13
					RHNIGQTSSPDIF	13
					QHQVPEEEGGSVL	13
					EEVVVEVEDGVVL	13
					TAEVAPEGKDTTL	13
					RESEESEDSELVR	13
					RSQVPQDRHQKVH	13
					STRVETEGGSIVV	13
					DGTGERKEWERIY	13
					SAWMTDEEFAREM	13
					AQGVPNEATQGTY	13
					HVDWRETDKAHIF	13
					EGGIKLPRDVIST	13
					TAKVPEEAQRELE	13
					EDLVVQVEENKIL	13
					EIFVPELDGPIMF	13
					TRVVTEGGRIVVL	13
					TLEDVPNQGTIRF	13
					VSPVHFDSEVVFF	13
					AFSATGAIEAAHA	13
					ASDVPIRIGINGF	13
					NSIRINQHSVFPL	13
					EDVVVEVEDGVVL	13
					SGDALRVPSGTTY	13
					NLHPGDAQRIPAG	13
					SVIVEISKKQIRE	13
					VRNDLENSLPKPY	13
					HPEWELPDDAVVY	13
					YEGGIKLPVDVIS	13
					NVINGGSHAGNKL	13
					SPNELDKGIGLVF	13
					RVFDGELQEGGVL	13
					ITLAIPVNKPGVF	13
					SGGIPLPTDIISK	13
					GNVVPEIEEKLVR	13
					AWMTDEEFAREML	13
					FVDAQPQQKEEGN	13
					TTQVPPHSVPVHT	13
					VVSVNPPLVVQFQ	13
					QVLHPNGGTVVNG	13
					FPGSAQDVERLLK	13
					AAHAIATGDLVSL	13
					SLKVREDENNPFY	13
					NKLPEIEEKLARK	13
					EAVGQTPLFPVIF	13
					ERVFDGELQEGVV	13
					FPGSAQAVEKLLK	13
					APIDTKPQTHAGY	13
					QVLHPNGGMVVNA	13
					QKPPLQDSHQKIR	13
					VNLNMGSILGPHW	13
					TQKTVDGPSAKDW	13
					VVNPDNNENLVLI	13
					VKGHEDRDKDDTL	13
					NVISQIPSQVQEL	13
					VQSPNELDKGIGL	13
					LVVSPNKPLVVWF	13
					NPENPSIELGPEF	13
					ASQVAKETKDATM	13
					DVQVYPEKGTVAF	13
					DQDDNGIIYPWETY	14
					DLNKDGVIYPWETF	14
					TKPTLPFPWLPETD	14
					NGLHLPSYSPYPQM	14
					KPTLPFPWLPETDM	14
					KLHENIARPSRADF	14
					NDDTNRHHGTTGVY	14
					ALKPDNRIESEGGF	14
					FLREDGTLKPVAIE	14
					LHEGGIKLPTEVIS	14
					DVWFPQPAPKDHPW	14
					KQQLQDSHQKIRHF	14
					QQQLQDSHQKIRHF	14
					LESELSGDFERAMY	14
					QSSRPQDRHQKIYN	14
					VLPVQNDASTGLHW	14
					GQSSRPQDRHQKIY	14
					RIDPELEKEIGAKF	14
					KGLKDKINLVPINL	14
					AVGAEAENELIELL	14
					VHVDKFEEKKDSVL	14
					AISKDISEGPPAIK	14
					GLKSVSQNVLPLLQ	14
					DKPNGPVWRISGED	14
					AHVDWRETDKAHIF	14
					SGIIHKIEETLHVG	14
					VISTIIPLPVIKEL	14
					GTIAAEDILHDIGA	14
					QKPPLQDSHQKIVH	14
					ERVFDGPLQPGVVL	14
					DGVGERKPHDRIYD	14
					STRVETPGGSIRVL	14
					REWWDSIPIVPIRV	14
					FAIGINAPNNQRNF	14
					GNKLKPIPPKLVRR	14
					QHQQEPPPVGGSVL	14
					AIGINAPNNQRNFL	14
					ESVIVPISKEQIRA	14
					NKVDENGTPKPSSL	14
					GNKLKPIPPKLARK	14
					ETRVETPGGRIRVL	14
					GPLVNPPSQQGSPR	14
					SVIVEISKPQIRAL	14
					VVNPDNNPNLRLIT	14
					ERVFDGPLQPGQVL	14
					NGTGPRKEYDRIYD	14
					LTLEDVPNQGTIRF	14
					AGSKDNVISQIPSQ	14
					SQRPQDRHQKVHRF	14
					TAEKAKNAKDTTVQ	14
					ATLDAKPRLDLDAP	14
					FPFPRPPHQKEERK	14
					ERVFDGELQEGGVL	14
					MVNLNMGSILGPHW	14
					QESVIVPISKEQIR	14
					AAEKAKNAKDTTVQ	14
					QSGDALRVPSGTTY	14
					FETRVPTEGGRIRV	14
					EFFGPGGRDPESVL	14
					YVVNPDNNENLRLI	14
					ANHTYVPSETPAPL	14
					ASEASDVAQNTKDY	14
					DGELQPGGVLIVPQ	14
					AAEKAKPGKDATVN	14
					GQHQQQPPEGGSVL	14
					KDWVFTDQALPADL	14
					LPEGPAVKIGENKD	14
					ANHTYVPSPTPAAL	14
					VVQSPNPLDKGIGL	14
					NGERVFDGPLQEGR	14
					DGTGERKEWPRIYD	14
					TPANWKPGDPVVIT	14
					WEAKGQTPLFPRIF	14
					DLANNKVAKVLITY	14
					ESVIVPISKKQIRE	14
					IKPPTDPQQQRPQE	14
					VINEGDANIELVGL	14
					LDLEPNKIVDFIKF	14
					EDLKVQVPPNKILQ	14
					ELDKGIGTIISSPY	14
					SDDINKQHDTTNAY	14
					VGDADDITSSLAHA	14
					VVLPVQNDGSTGLH	14
					SSIRINQHSVFPPN	14
					SAIDNAHIDQWIDF	14
					RNSWPPPNPHIGIN	14
					SGGIKLPTDIISKI	14
					IYPAVDPLPSTSRM	14
					REGDLIAVPTGVAW	14
					GHPEWPLPDPAGKY	14
					ITGDHGVTVTETTF	14
					ALEPDHRVESEGGL	14
					AQVELRDEHGNPVE	14
					KVINPRFGIVEGLM	14
					YIVTPPKPGPDSEL	14
					SLAKDIGADWDIDY	14
					STGHVPSSGGESSA	14
					IGKDPTPQTAIDNL	14
					AFPGSAQAVEKLLK	14
					SRNELDKGIGTIIS	14
					YFVDAQPQPKEEGN	14
					DTEGRYVPANIENI	14
					EEVKVPVEPGRVLQ	14
					FDQDDNGIIYPWETY	15
					FLREDGTLKPVAIEL	15
					TKPTLPFPWLPETDM	15
					KLGELKDSAADAAKR	15
					DVRDLHEGGIKLPTE	15
					NALKPDNRIESEGGF	15
					ARDDDVKPDSELQQW	15
					AISKDISEGPPAIKL	15
					HAHVDWRETDKAHIF	15
					HRNPEEIPWGSTGAD	15
					NALKPDNRIESEGGL	15
					LKPDNRIESEGGLIE	15
					LEKTYEPVKVGDIEY	15
					QKQQLQDSHQKIRHF	15
					QEGVIVELSKEQIRQ	15
					LVLPVQNDASTGLHW	15
					VVLPVQNDGSTGLHW	15
					KGQSSRPQDRHQKIY	15
					PAMRKPQQEEDDDDE	15
					MQVPVLVDLNGNHLW	15
					NALEPDHRVESEGGL	15
					GAWETAKDTTQKIKE	15
					RKENEQSSLKDISKY	15
					SQQQLQDSHQKIRHF	15
					TLDVDLKDAVTPDVL	15
					PSVDLVMDKPNGPVW	15
					IAKNSWGEDWGEDGY	15
					SKEEIEKMVKDAERY	15
					ESVIVEISKKQIREL	15
					QESVIVEISKKQIRE	15
					EDKDFPTRVPTEGGR	15
					SIGEKLGDAKQREEL	15
					QESVIVPISKPQIRA	15
					ESVIVPISKPQIRAL	15
					NGERVFDGPLQEGRV	15
					VIKPPTDPPPPRPQE	15
					NARPQGVNNNGPPKL	15
					EPKQKKKMEKELINL	15
					KSSSPKTISSEDKPF	15
					LAGSKDNVISQIPSQ	15
					LNKVDPNGTPKPSSL	15
					ARDDDVKNDSELQHW	15
					FETRVPTEGGRIRVL	15
					FWPAKGQTPLFPRIF	15
					GQRDNPHWTSDSKAL	15
					GKHQQPPPNEGGSIL	15
					GQHQQPPPEEGGSVL	15
					FVDAQPQQKEEGSKG	15
					SKDNVISQIPSQVQE	15
					AENKPDNRIPGEIIY	15
					EPFFGPGGRDPESVL	15
					GPTTGDKIRLGDTDL	15
					KEGSSIINTTSVNAY	15
					LQRDDVELVAVNDPF	15
					PAVKIGPNKDAMDGW	15
					VKGHPDKDARDTLEM	15
					ITDQKISAIKDIIPL	15
					LEEKQKKKMEKELIN	15
					QGQHQQQEEEGGSVL	15
					NELDKGIGTIISSPY	15
					VVSGDLAQKPVAPED	15
					ELAFPGSAQDVERLL	15
					AGHPPWELPDDAGKY	15
					IKDYGQQQISGVQAS	15
					SKARYDEIVKEVSSY	15
					SPDIYNPQAGSVTTA	15
					SSAIDNAHIDQWIDF	15
					VVNPDNNENLRLITL	15
					GNIGVLTGDEGEIRL	15
					REGDLIAVPTGVAWW	15
					ELISNASDALDKLRF	15
					RNSWDPPNPHIGINV	15
					DTEGRYVPANIENIF	15
					ILPQPISVSIDAKDF	15
					NIGQNSSPDIYNPQA	15
					SVIEILSTHASDEVY	15
					TFEDPTTSPVAPATL	15
					AKVINDRFGIVEGLM	15
					SAKDAAGTVADKSRE	15
					ELPDGQVITIGAERF	15
					RSQRPQDRHQKVHRF	15
					PFPRPRQPHQEEEHE	15
					LAGPKDNVVRQIERQ	15
					LTDKARDVKERAKDY	15
					TVTVPKEEDKKPQVK	15
					QVFLPADEGVESSIW	15
					LPPFPPKSNLDPAIY	15
					NSWDPPNPHIGINVN	15
					QSKPNTILLPHHADAD	16
					EATKPTLPFPWLPETD	16
					ATKPTLPFPWLPETDM	16
					LEATKPTLPFPWLPET	16
					QDVRDLHEGGIKLPTE	16
					LNALKPDNRIESEGGF	16
					VPIPQHHTNPTKPINL	16
					GHRNPEEIPWGSTGAD	16
					LNALKPDNRIESEGGL	16
					SGDVWFPQPAPKDHPW	16
					WAISKDISEGPPAIKL	16
					ITPLKPSAPKIPLEVL	16
					NALKPDNRIESEGGFI	16
					ALKPDNRIESEGGLIE	16
					ARDDDVKPDSELQQWW	16
					ATKEGKAIGIDLGTTY	16
					QESVIVEISKKQIREL	16
					QEGVIVELSKEQIRQL	16
					SQKQQLQDSHQKIRHF	16
					APAMRKPQQEEDDDDE	16
					LNALEPDHRVESEGGL	16
					AIKKKDEIERVAKANR	16
					LVVLPVQNDGSTGLHW	16
					AAKELEQLNREKDRDF	16
					KAKDTTMVDVPVKVPY	16
					NLHPGDAQRIPAGTTY	16
					VMDKPNGPVWRISGED	16
					WIAKNSWGEDWGEDGY	16
					QESVIVPISKPQIRAL	16
					FVDAQPQQKEEISIIR	16
					RHNIGQTSSPDIFNPQ	16
					SVIKPPTDPQQQRPIE	16
					KGKHQQPPPNEIPSIL	16
					QVVDISGNPIFPIPTY	16
					GDHTSPITKEHLEPNL	16
					LKEQQQPQQQEEQPLE	16
					QGQHQQEEEEEGGSVL	16
					AGKDNIVSSLDNVAKE	16
					AGKDEDKQDLIVTPTG	16
					ATNPAQSPPGTIRPDF	16
					TNRGPGGTATAHNIRA	16
					LEEKQKKKMEKELINL	16
					DGELQEPPVLIVPINF	16
					NGERVFDGELQEPPVL	16
					NLQSGDALRVPAPTTY	16
					VIKPPTDEQQQRPIEE	16
					RNELDKPIGTIISSPY	16
					AAKDLEDANRLRDNTF	16
					GSKDNVISQIPSQVQE	16
					NGERVFDGPLQEPPVL	16
					STSDPPPLFDGTTILY	16
					RAGHPEWPLPDDAIKY	16
					ANHTYVPSETPAPLVE	16
					TPSVIEPSFGIGRIIY	16
					VINEGEANIELVIIKE	16
					SVHLEDEVSKETSIDY	16
					ITPEKNPQLRDLDVFL	16
					VQELAFPGSAQDVERL	16
					VVEEIFSKELDGPIMF	16
					KAETKEGGGEEKGMRR	16
					NFREGDLIAVPTGVAW	16
					ARDDDVKNDSELQHWW	16
					GLDFTKDDENVNSIPF	16
					YVVNPDNNENLRLITL	16
					AILPQPISVSIDAIDF	16
					GAKDTIGSVDHITTPL	16
					TSIGEKLGDAKQREEL	16
					HGGPYPPLSEPDIIVL	16
					ITGQVLHPNGGTVVNG	16
					VVDLKTSLPEWVRIGF	16
					LDNVTGNITPGGPEVL	16
					VKKPLDKATEGGREVL	16
					VVQSPNELDKGIGLVF	16
					QSKPNTILLPHHADADF	17
					LEATKPTLPFPWLPETD	17
					EATKPTLPFPWLPETDM	17
					GIRNPEEIPWGEVGADY	17
					NHAITPLKPSAPKIPLE	17
					NALKPDNRIESEGGLIE	17
					DVRDLHEGGIKLPTEVI	17
					QDVRDLHEGGIKLPTEV	17
					HPRPHQPHQKEEEKHEW	17
					SQEQLKKPQGEQDPIKY	17
					RHNIGQTSSPDIYNPQA	17
					DMTIGGQPAGRIVMELY	17
					IAKNSWGEDWGEDGYIW	17
					GRKPTRKDPNSESRSND	17
					VMDKPNGPVWRISGEDL	17
					GAKKVIISAPSKDAPMF	17
					ATVNVAKPKPNNTVAVF	17
					GSKDNVISQIPSQVQEL	17
					VNPRVPEVVAMPELENL	17
					TAPAMRKPQQEEDDDDE	17
					DMTIGGQSAGRIVMELY	17
					KEPGSSAGELVVIALAH	17
					SATGAIEAAHAIATGDL	17
					VVIKPPTDEQQQRPIEE	17
					KEQHQHDENKPGVIISM	17
					DKVVVKVEESRPGAIAE	17
					VIKPPTDEQQQRPQEEE	17
					VKIDANEEKNKDLASQY	17
					VRNELDKGIGTIISSPY	17
					TGGNKDQTREEEEETRR	17
					RHNIGQTSSPDIFNPQA	17
					EITPEKNPQLRDLDVFL	17
					IKLPTDILSKISPLPVL	17
					VGAKDTIGSVDHITTPL	17
					AGSKDNVISQIPSQVQE	17
					VGIRVNGVAPGPIWTPL	17
					HGGEYPPLSEPDIGVLL	17
					KALVTDADNVIPKAVDA	17
					VVQSRNELDKGIGTIIS	17
					IEEVWNDRNPLLPSDPY	17
					GEITAIDIKEGQKELPY	17
					FVDAQPQQKEEGSKGRK	17
					VGAQGAQPKESKTATTY	17
					GSQDNVISQIPSQVQEL	17
					NARPQGVNNNGPPKLSM	17
					VAILEQPISVSIDAKDF	17
					EEQQRESEESEDSELRR	17
					VSLPGVLPVASGGIHVW	17
					RNSWDPPNPHIGINVNS	17
					VEDLPEGPAVKIGENKD	17
					TVVQSPNELDKGIGLVF	17
					VEQLEGKEKKQMERELM	17
					QSKPNTILLPHHADADFL	18
					LEATKPTLPFPWLPETDM	18
					DVRVLHEGGIKLPTEVIS	18
					QDVRLLHEGGIKLPTEVI	18
					DGTGERKEWERIYDYDVY	18
					VDLSVIEILSRHASDEVY	18
					NALEPDHRVESEGGLIQT	18
					AGSKDNVISQIPSQVQEL	18
					MNPVPQFTSPDYKPSNKL	18
					EDKDFETRVETEGGRIRV	18
					VMDKPNGPVWRISGEDLM	18
					DFVLDNEGNPLENGGTYY	18
					FDMTIGGQPAGRIVMELY	18
					IDLSVIEILSRHASDEVY	18
					IKLPTDILSKISPLPVLK	18
					APGPVWTPIQPASKPAEM	18
					LVVEDIDATDSGGPMVPW	18
					VVLPVQNDGSTGLHWANL	18
					GATVNVAKPKPNNTVAVF	18
					NVTVPKVEKKPENKNVRQ	18
					ASQVAKETKDKTMEKAGE	18
					TAEVAKNAKDTTVQKAGE	18
					SVIVPPTDEQQQRPQEEE	18
					VIKPPTDEQQQRPQEEEE	18
					VGLVEQQQEQQQEEQPLE	18
					DKVVVKVEESRPGAIAET	18
					AAKVIGDINRTNERDEGY	18
					GDHVSQITKEHLEPNLEG	18
					AAEVAKNAKDTTVQKAGE	18
					FEIVPEKNPQLRDLDVFL	18
					FVDAQPQQKEEGSKGRKG	18
					GLSVIKPPTDEQQQRPQE	18
					GGAVDTIGSVDHITTPLA	18
					LAGSVDNVISQIPSQVQE	18
					SQKVKHQQEEENEGGSIL	18
					FEEPQQKGQSSRPQDRHQ	18
					VVEVLPEGPAVKIGENKD	18
					TAIVETVSSAGEKVKKPF	18
					MEEVAKAEQKKIGMTETW	18
					PEGPAVKIGENKDAMDGW	18
					NSKPNTLLLPNHADADYL	18
					NMVDPDEKDSTGNLPSRA	18
					QSRVELDKGIGTIISSPY	18
					KSQVVKEKLGGQHRDAEL	18
					DEDVDKPRPSRPSQGKRE	18
					KALVTDADNVIPKAVDAF	18
					IISVEDLIHEIITVGPHF	18
					QTSVPDIYNPQAGSVTTA	18
					IGQVSSPDIYNPQAGSVT	18
					VVNVDNVFEDPDGLKEQL	18
					DVTVITGDHGVTVTETTF	18
					RLQVSVIVEISKEQIRAL	18
					KHMVEGSSIINTTSVNAY	18
					MPVVELEVNPDGSAVDNL	18
					TFAVVDNIVSSLDNVAKE	18
					TKIDVRSGKELEKEPKFL	18
					NPWWAISKDISEGPPAIKL	19
					SVGEGVTHLKPGDHALPVF	19
					ASQKAKEAKDKTMEKGGEY	19
					NALEPDHRVESEGGLIQTW	19
					NHAITPLKPSAPKIPLEVL	19
					TAEKAIEGKDSAVGKLGEL	19
					QDVRDLHEGGIKLPTEVIS	19
					LPRDVISTIIPLPVIKELY	19
					TAEKAKEGKDTTLGKLGEL	19
					KGGAKKVIISAPSKDAPMF	19
					LAGSKDNVISQIPSQVQEL	19
					EDKDFETRVETEGGRIRVL	19
					LAGEKDNVVRQIERQVQEL	19
					ALVVEDIDATDSGGPMVPW	19
					KEPGSSAGELVVIALAHAF	19
					RTGRKPTRKDPNSESRSND	19
					TAEVAINAIDTTVQIAGEY	19
					DKVVVIVEESRPGAIAETL	19
					LVVEDLPEGPAVIIGENID	19
					LVIVPPTDEQQQRPQEEEE	19
					ASQVAIETKDITMEKAGEY	19
					AAEVAIEGKDATVNIMGEY	19
					GDHTSQITIEHLEPNLEGL	19
					AAEVAINAKDTTVQIAGEY	19
					LPEGPAVIIGENIDAMDGW	19
					GSQVAIETIDATIEKAGEY	19
					LATVAIEAAHAIATGDLVS	19
					IFEEDIDFETRVETEGGRI	19
					TVAEVIGSNVVSVAEDELM	19
					LKEVIIEQQQEEQPLEVRK	19
					FEEVIIKGQSSRPQDRHQK	19
					VQSVNILDKGIGTIISSPY	19
					LAGVQINVISQIPSQVQEL	19
					NIGVTSSPDIYNPQAGSVT	19
					SNIVETFEENLGGIGEKRE	19
					FPFPRIPHQIEERIQEEDE	19
					NIGVNSSPDIYNPQAGSIT	19
					LEEVQIIKMEIELINLATM	19
					NIPTKINIGTVEIITPVEL	19
					GIISTEDLIHEIITVGPHF	19
					LVNVDIVFEDPDGLIEQLL	19
					LTNPIIQQTGLGELGQDVL	19
					LKSVPIPETNDEPVIVVVG	19
					LTGAIIAAHAIATGDLVSL	19
					DTVVSAIDAAGTVADISRE	19
					QSKPNTILLPHHADADFLLF	20
					ATKPTLPFPWLPETDMKVDG	20
					GASLKPEFVDIINAATVKKN	20
					GVAPGPVWTPIQPASKPAEM	20
					EEPQQKGQSSRPQDRHQKIY	20
					NTWKEQHQHDENKPGVIGSM	20
					LATGAIIAAHAIATGDLVSL	20
					LVKGKHQQIIINEGGSILSG	20
					LVAKDNAKINVSGADEGARR	20
					GVTVVPGGTGGKSLIAQQHL	20
					LVIQQQEQQQEEQPLEVRKY	20
					NIGQNSSPDIYNPQAGSITT	20
					TPANWKPGDPVVITPDVTNE	20
					LVQSRNILDKGIGTIISSPY	20
					PVPRQPHQVVVHEQKVVHEW	20
					FPFPRPPHQVVVRKQVVDED	20
					IVQTSSPDIYNPQAGSVTTA	20
					GVIKLPTEVISTIMPLPVVK	20
					DNQSEQLEGKVKKQMERELM	20
					DLPEGPAVKIGVNKDAMDGW	20
					QVEDRAVAAAKVAAKVLVQL	20
					LVDVTDITGDHGVTVTVTTF	20
					LDVKPWDDETDMKKLEEAVRS	21
					RHNIGQTSSPDIYNPQAGSVT	21
					FEEPQQKGQSSRPQDRHQKIY	21
					GKGSEEEQDEREHPRPHQPHQ	21
					SGGIKLPTDIISKISPLPVLK	21
					AQKPKPSEGNPQKEGTGSIVF	21
					SSGKLQLNKVDENGTPKPSSL	21
					NGVAPGPVWTPIQPASKPAEM	21
					GLPVIKPPTPPQQQRPQPEEE	21
					EILEPNLPGLTVDEAIQPKRL	21
					LEPGQSTPPSAQSGKDNPQGF	21
					GIPSQKGPHQQEEENEGPIIL	21
					VIPEGEANIELVGIKEQPQRQ	21
					LIPEDLPPGPAVKIGENKDAM	21
					RIPIGQTSSPDIFNPQAPIIT	21
					EDPPEGPAVKIGENKDAPIGW	21
					TIVQSRNPLDKGIGTIISIPY	21
					NIPQNSSPPIYNPQAGSITTA	21
					NIPQTSSPPIYNPQAGSVTTA	21
					RINIGQNPSPDIYNPQAPIIT	21
					LIPPLSVIKPPTDEQQQRPQE	21
					LEQAKESPITAGKDTPQPIIE	21
					MIPNELEVNPDGSAVDNLIAF	21
					GGPGDKVVVKVEESRPGAIAE	21
					IFEEDKDFETRVETEGGRIRVL	22
					SVDLPGLKKEDVKVEVEDGRVL	22
					EILEPNLEGLTVDEAIQNKRVF	22
					KTAQAKDNAKENVSGADEGAVR	22
					PFPRPRQPHQEEEHEQKEEIEW	22
					RHNIGQTSSPDIFNPQAGSIVT	22
					VQNIGQNSSPDIYNPQAGSIVT	22
					HNIGQTSSPDIYNPQAGSVTTA	22
					NVTVPKVEKKPENKNVRQIDVV	22
					VQGETVVPGGTGGKSLEAQQVL	22
					GGLSVIKPPTDEQQQRPQEEEE	22
					KIMDNQSEQLEGKEKKQMEREL	22
					IMDNQSEQLEGKEKKQMERELM	22
					VEDLPEGPAVKIGENKDAMDGW	22
					VGHQDVTDITGDHGVTVTETVF	22
					NSNKINAYPSVDLVMDKPNGPVW	23
					RHNIGQTSSPDIYNPQAGSVTTA	23
					GGIKLPTEVISTIMPLPVVKELF	23
					KIMDNQSEQLEGKEKKQMERELM	23
					NAAEQHLTNSVEEITAAALERVY	23
					RHNIGQTSSPDIFNPAAGSITTA	23
					FPFPRPRQPHQEEEHEAKEEHEW	23
					RQNIGQNSSPDIYNPAAGSITTA	23
					PFPRPRQPHQEEEHEAKEEHEWH	23
					LVEDLPEGPAVKIGENKDAMDGW	23
					QEEDEDEEQQRESEESEDSELRR	23
					EAGKPLVIEEVEVAPPAAGEVRL	23
					SGGIKLPTDIISKISPLPVLKEIF	24
					LVVEDLPEGPAVKIGENKDAMDGW	24
					VKGGLSVIKPPTDEQQQRPQEEEE	24
					PFPRPRQPHQEEEHEQKEEHEWHRY	25
					LVVEDLPEGPAVKIGENKDAMDGWY	25
					LNNAAEQHLTNSVEEITQQQLERVY	25
					QEQGGHQSQKGKHQQEEENEGGSIL	25
					LQKIMDNQSEQLEGKEKKQMERELM	25
					LQETVHQAQKETATKAQKDISETRY	25
					ETIAEIAETTKVIVAGEGEKEIIVK	25

## Sheet: Figure S2-B
	Peptides	Mini	Average	Max
	Octapeptide	902.409	963.656	1063.53
	Nonapeptide	812.378	1061.72	1221.65
	Decapeptide	926.446	1175.61	1360.64
	Undecapeptide	997.483	1268.66	1549.67
	Dodecapeptide	1069.48	1375.56	1583.85
	Trideceptide	1215.59	1485.25	1730.92
	Tetradeceptide	1258.54	1583.43	1817.95
	Pentapeptide	1504.75	1704.17	1974.05
	Hexadeceptide	1561.82	1785.03	2012.9
	Heptapeptide	1567.78	1883.46	2228.06
	Octadeceptide	1751.91	1999.71	2293.03
	Nineteen	1753.88	2076.51	2422.17
	Eicoseptide	1866.97	2212.74	2634.2
	Hexadecanopeptide	2120	2282.38	2585.27
	Dodecopeptide	2248.16	2475.36	2878.32
	Others-peptide	2411.18	2712.43	3299.57

## Sheet: Figure S2-C
	Peptides	Length	Molecular weight	Hydrophobicity	Isoelectric point
1	ILLPHHADADFL	12	1361.56	0.608	5.251
2	VYPEKDTGRHHF	12	1485.62	1.567	7.705
3	QSKPNTILLPHHADADF	17	1904.11	-0.618	6.499
4	QSKPNTILLPHHADADFL	18	2017.27	0.372	6.499
5	RAEKDLKDIKELY	13	1620.87	-1.354	6.618
6	QSKPNTILLPHHADAD	16	1756.94	0.831	6.499
7	YLVNPHDHQNL	11	1349.47	-1.045	6.496
8	DQDDNGIIYPWETY	14	1728.79	-1.3	3.26
9	DLNKDGVIYPWETF	14	1696.88	-0.536	3.876
10	QSKPNTILLPHHADADFLLF	20	2277.61	-0.005	6.499
11	FDQDDNGIIYPWETY	15	1875.96	-1.027	3.26
12	REEELHNLRG	10	1252.35	-1.9	5.576
13	RISSDLKPGM	10	1103.3	-0.53	9.695
14	KPFDELFVDF	10	1256.42	0.04	3.876
15	TKPTLPFPWLPETD	14	1641.88	-0.707	4.184
16	NGLHLPSYSPYPQM	14	1603.81	-0.721	7.535
17	KPTLPFPWLPETDM	14	1671.97	-0.521	4.184
18	KEQEQKDDRWH	11	1498.58	-3.4	5.595
19	HRISSDLKPGM	11	1240.44	-0.773	9.697
20	RISSDLKPGMV	11	1202.43	0.1	9.695
21	RISADLKPGMV	11	1186.43	0.136	9.695
22	EWERIYDYDVY	11	1550.64	-1.327	3.738
23	ANDAAHKSKDY	11	1219.28	1.655	7.541
24	FLREDGTLKPVAIEL	15	1701	0.207	4.426
25	TKPTLPFPWLPETDM	15	1773.08	-0.533	4.184
26	NPWWAISKDISEGPPAIKL	19	2122.45	0.316	6.493
27	KELELDKF	8	1021.18	-0.988	4.426
28	HRISSDLKPGMV	12	1339.58	-0.358	9.697
29	ELKDSAADAAKR	12	1274.4	-1.05	6.554
30	PVNKPGRY	8	930.075	1.575	10.455
31	KDISEGPPAIKL	12	1267.49	0.383	6.493
32	DVRDLHEGGIKL	12	1351.53	0.55	5.519
33	IETWNSQHPELQ	12	1481.59	-1.367	4.254
34	LKPDNRIESEGG	12	1314.42	-1.442	4.426
35	ARDDDVKPDSEL	12	1359.41	1.542	3.884
36	EATKPTLPFPWLPETD	16	1842.08	0.725	3.928
37	ATKPTLPFPWLPETDM	16	1844.16	0.388	4.184
38	QLIVVPENPLHL	12	1371.64	0.617	5.363
39	VYVPRDENFGHL	12	1445.6	-0.542	5.454
40	TIIPLPVIKELY	12	1398.75	1.058	6.402
41	LEATKPTLPFPWLPET	16	1840.15	-0.269	4.258
42	LEATKPTLPFPWLPETD	17	1955.24	-0.459	3.928
43	EATKPTLPFPWLPETDM	17	1973.27	0.571	3.928
44	GIRNPEEIPWGEVGADY	17	1902.05	-0.8	3.778
45	NRNGLHLPSYSPY	13	1517.66	-1.146	9.174
46	QDVRDLHEGGIKL	13	1479.66	-0.777	5.519
47	LKPDNRIESEGGL	13	1427.58	-1.038	4.426
48	LKPDNRIESEGGF	13	1461.59	-1.115	4.426
49	LREDGTLKPVAIE	13	1440.66	-0.269	4.426
50	AAAAKHHLAEAAE	13	1289.41	0.069	6.501
51	VWFPQPAPKDHPW	13	1604.83	-1.038	7.549
52	LEATKPTLPFPWL	13	1512.81	0.115	6.409
53	VVGVNEHEYKPEL	13	1512.68	-0.615	4.474
54	HPRPHQPHQ	9	1133.24	-2.878	10.555
55	LEATKPTLPFPWLPETDM	18	2086.43	-0.328	3.928
56	SRHASDEVY	9	1063.09	-1.289	5.454
57	NDDTNRHHG	9	1065.03	-2.889	6.499
58	NKELELDKF	9	1135.28	1.267	4.426
59	ISKKQIREL	9	1114.35	-0.811	10.789
60	QQQHQYPHR	9	1221.3	-3.089	9.354
61	GVNTGGAHT	9	812.837	-0.367	7.55
62	GSKDNVIRQ	9	1016.12	1.267	9.695
63	KLHENIARPSRADF	14	1653.86	1.021	9.692
64	NDDTNRHHGTTGVY	14	1586.6	-1.779	6.498
65	ALKPDNRIESEGGF	14	1532.67	-0.907	4.426
66	FLREDGTLKPVAIE	14	1587.84	0.05	4.426
67	LHEGGIKLPTEVIS	14	1492.73	0.2	5.493
68	DVWFPQPAPKDHPW	14	1719.92	1.214	5.408
69	SVGEGVTHLKPGDHALPVF	19	1960.22	0.084	6.5
70	REEELKNLRG	10	1243.38	-1.97	6.61
71	VELSKEQIRQ	10	1229.4	-1.07	6.532
72	QDSHQKIRHF	10	1295.42	-1.88	9.699
73	KEQEQKDDRW	10	1361.43	-3.42	4.545
74	KLGELKDSAADAAKR	15	1572.78	0.873	9.44
75	DVRDLHEGGIKLPTE	15	1678.86	0.827	4.539
76	LNKELELDKF	10	1248.44	0.76	4.426
77	NALKPDNRIESEGGF	15	1646.78	-1.08	4.426
78	ARDDDVKPDSELQQW	15	1801.89	-1.76	3.884
79	AISKDISEGPPAIKL	15	1538.8	0.06	6.493
80	HAHVDWRETDKAHIF	15	1862.04	-1	6.794
81	AIPVNKPGRY	10	1114.31	-0.63	10.455
82	RPQDRHQKIY	10	1340.51	-2.5	10.447
83	HRNPEEIPWGSTGAD	15	1665.74	1.453	4.421
84	NVAGIAHRAY	10	1071.2	0.12	9.351
85	IYDDELAERR	10	1279.37	-1.42	4.105
86	LDHHDPIMPY	10	1237.39	-0.77	5.251
87	NALKPDNRIESEGGL	15	1612.76	-1.013	4.426
88	LKPDNRIESEGGLIE	15	1669.85	-0.833	4.148
89	LEKTYEPVKVGDIEY	15	1783.01	-0.693	4.148
90	ATKPTLPFPWLPETDMKVDG	20	2243.6	0.49	4.37
91	AGSKDNVIRQ	10	1087.2	0.96	9.695
92	LDVKPWDDETDMKKLEEAVRS	21	2504.8	1.19	4.167
93	QDVRDLHEGGIKLPTE	16	1806.99	-0.994	4.539
94	LNALKPDNRIESEGGF	16	1759.94	-0.775	4.426
95	VPIPQHHTNPTKPINL	16	1806.1	0.725	9.704
96	GHRNPEEIPWGSTGAD	16	1722.79	-1.388	4.421
97	LNALKPDNRIESEGGL	16	1725.92	-0.713	4.426
98	SGDVWFPQPAPKDHPW	16	1864.05	-1.138	5.408
99	WAISKDISEGPPAIKL	16	1725.02	0	6.493
100	ITPLKPSAPKIPLEVL	16	1716.14	0.45	9.537
101	NALKPDNRIESEGGFI	16	1759.94	0.731	4.426
102	ALKPDNRIESEGGLIE	16	1740.93	0.669	4.148
103	ARDDDVKPDSELQQWW	16	1988.1	-1.706	3.884
104	ATKEGKAIGIDLGTTY	16	1637.85	-0.188	6.486
105	LQDSHQKIRHF	11	1408.58	-1.364	9.699
106	FIYDDELAERR	11	1426.55	-1.036	4.105
107	VMDKPNGPVWR	11	1298.53	0.873	9.695
108	ASGAAQKTKDY	11	1139.23	-1.145	9.256
109	SRPQDRHQKIY	11	1427.59	-2.345	10.447
110	GIIELKGPKQY	11	1245.48	0.518	9.256
111	LAIPVNKPGRY	11	1227.47	-0.227	10.455
112	RVETGVVKPGM	11	1172.41	-0.045	9.695
113	TIIPLPVIKEL	11	1235.57	1.273	6.409
114	GGESKPQFNIF	11	1223.35	0.682	6.409
115	RYPSYPQSQGW	11	1368.47	-1.836	9.172
116	VNPKDHNKPVQ	11	1275.43	-1.8	9.539
117	TEGAELIDSVL	11	1146.26	0.518	3.425
118	IYDDELAERRL	11	1392.53	0.945	4.105
119	NHAITPLKPSAPKIPLE	17	1826.17	-0.335	9.539
120	NALKPDNRIESEGGLIE	17	1855.04	0.835	4.148
121	DVRDLHEGGIKLPTEVI	17	1891.15	0.218	4.539
122	QDVRDLHEGGIKLPTEV	17	1906.13	0.688	4.539
123	NSNKINAYPSVDLVMDKPNGPVW	23	2558.89	0.574	6.441
124	LLQVSHQKIRHF	12	1505.79	0.292	11.652
125	RIKEKLPGHHTH	12	1452.68	1.65	10.789
126	LVVVVGNVVDRY	12	1331.58	1.317	6.332
127	DELVIVIPTIRN	12	1381.63	0.7	4.184
128	AAGVKDMLDRHF	12	1359.57	-0.225	7.55
129	LSRPQDRHQKIY	12	1540.74	-1.833	10.447
130	LEVEVEEEDPEL	12	1429.5	0.842	3.141
131	NSVKINAYPSVD	12	1306.44	-0.35	6.331
132	IETWNPNNKPFQ	12	1487.63	1.575	6.409
133	DLVGQDITAAAM	12	1204.36	0.683	3.492
134	PVQNLGSTGLHW	12	1308.46	0.267	7.55
135	INLVKPDDRDPY	12	1444.61	-1.2	4.312
136	PVVNLASTGLHW	12	1293.49	0.558	7.55
137	VAIKLPSAPHGL	12	1202.46	0.7	9.702
138	WGVLAKELDALR	12	1370.61	0.208	6.494
139	LIEKLIKKLLDA	12	1396.78	0.608	9.442
140	LELSGLFERAMY	12	1428.67	0.325	4.258
141	VNVGGAHTEAGY	12	1174.23	0.117	5.363
142	DVRVLHEGGIKLPTEVIS	18	1962.28	0.178	5.549
143	IRVNGVAPGPVW	12	1264.49	0.5	10.55
144	QDVRLLHEGGIKLPTEVI	18	2017.36	0.006	5.549
145	LVNTGGAHTEAG	12	1126.19	0.1	5.363
146	LPHFNSKAIVIL	12	1351.65	1.033	9.702
147	DGTGERKEWERIYDYDVY	18	2294.42	-1.75	4.074
148	ASQKAKEAKDKTMEKGGEY	19	2099.34	-1.753	9.161
149	NALEPDHRVESEGGLIQTW	19	2151.32	-0.811	4.146
150	NHAITPLKPSAPKIPLEVL	19	2038.46	0.121	9.539
151	TAEKAIEGKDSAVGKLGEL	19	1916.16	-0.353	4.588
152	QDVRDLHEGGIKLPTEVIS	19	2106.36	-0.421	4.539
153	LPRDVISTIIPLPVIKELY	19	2179.67	0.779	6.488
154	QQLQDSHQKIRHF	13	1664.84	-1.692	9.699
155	ERIKEKLPGHHTH	13	1581.8	-1.792	9.541
156	SSRPQDRHQKIYN	13	1628.77	-2.315	10.447
157	QSSRPQDRHQKIY	13	1642.8	-2.315	10.447
158	AYEEIYQEDLIKR	13	1669.85	-1.069	4.148
159	RHNIGQTSSPDIY	13	1487.59	-1.138	7.543
160	FNSNKINAYPSVD	13	1468.59	-0.7	6.331
161	KNSWGEDWGEDGY	13	1542.54	-2.038	3.738
162	QLETAAGAAIRFF	13	1394.59	0.654	6.41
163	VPVLVDLNGNHLW	13	1475.71	0.569	5.292
164	SPHWNLNANSVIY	13	1514.66	0.369	7.542
165	NSNKINAYPSVDL	13	1434.57	-0.623	6.331
166	LPVQNDGSTGLHW	13	1423.55	0.515	5.292
167	GVNTGGAHTEAGY	13	1233.26	0.515	5.363
168	AIPVNKPGRYDDF	13	1491.67	-0.808	6.442
169	GEEVKVVVPESVL	13	1383.61	0.585	3.98
170	HFIVPELGPDVNF	13	1483.69	0.385	4.181
171	KPNLEADHIPTWL	13	1533.75	0.654	5.454
172	LIETWNPNNKPFQ	13	1600.79	1.162	6.409
173	ETGVVKPGMVVTF	13	1363.63	0.792	6.409
174	GINTGGAHTEAGY	13	1247.29	0.492	5.363
175	GASLKPEFVDIINAATVKKN	20	2115.46	0.01	9.442
176	KQQLQDSHQKIRHF	14	1793.02	-1.85	10.789
177	QQQLQDSHQKIRHF	14	1792.97	-1.821	9.699
178	LESELSGDFERAMY	14	1646.79	0.55	3.778
179	QSSRPQDRHQKIYN	14	1756.9	-2.4	10.447
180	VLPVQNDASTGLHW	14	1536.71	-0.021	5.292
181	GQSSRPQDRHQKIY	14	1699.85	-2.179	10.447
182	RIDPELEKEIGAKF	14	1644.89	-0.779	4.588
183	KGLKDKINLVPINL	14	1564.93	0.029	10.507
184	AVGAEAENELIELL	14	1470.64	0.543	3.371
185	VHVDKFEEKKDSVL	14	1672.9	0.75	5.595
186	AISKDISEGPPAIK	14	1425.64	0.207	6.493
187	GLKSVSQNVLPLLQ	14	1495.78	0.4	9.7
188	DKPNGPVWRISGED	14	1569.69	-1.386	4.37
189	AHVDWRETDKAHIF	14	1724.9	0.843	6.502
190	SGIIHKIEETLHVG	14	1532.76	0.136	6.501
191	VISTIIPLPVIKEL	14	1534.94	1.564	6.409
192	GTIAAEDILHDIGA	14	1395.53	0.536	3.875
193	QKQQLQDSHQKIRHF	15	1921.15	-1.96	10.789
194	QEGVIVELSKEQIRQ	15	1755.99	-0.627	4.479
195	LVLPVQNDASTGLHW	15	1649.87	0.233	5.292
196	VVLPVQNDGSTGLHW	15	1621.81	0.113	5.292
197	KGQSSRPQDRHQKIY	15	1828.02	-2.293	10.886
198	PAMRKPQQEEDDDDE	15	1802.84	-2.627	3.71
199	MQVPVLVDLNGNHLW	15	1735.03	0.387	5.292
200	NALEPDHRVESEGGL	15	1622.71	-0.987	4.146
201	GAWETAKDTTQKIKE	15	1705.88	-1.4	6.582
202	RKENEQSSLKDISKY	15	1825.01	-1.94	9.22
203	SQQQLQDSHQKIRHF	15	1880.05	-1.753	9.699
204	TLDVDLKDAVTPDVL	15	1613.83	0.327	3.662
205	PSVDLVMDKPNGPVW	15	1653.91	0.2	4.109
206	IAKNSWGEDWGEDGY	15	1726.78	-1.347	3.738
207	SKEEIEKMVKDAERY	15	1855.09	1.56	4.707
208	ESVIVEISKKQIREL	15	1771.09	0.147	6.609
209	QESVIVEISKKQIREL	16	1899.22	-0.356	6.609
210	QEGVIVELSKEQIRQL	16	1869.15	-0.35	4.479
211	LVPEQIRL	8	967.176	0.4	6.41
212	DVHQKIRH	8	1032.17	1.638	9.699
213	FNPKPNTL	8	930.071	1.025	9.7
214	SQKQQLQDSHQKIRHF	16	2008.23	-1.888	10.789
215	DGELQEGR	8	902.916	-1.938	3.928
216	LKPQQARL	8	953.153	0.95	11.652
217	APAMRKPQQEEDDDDE	16	1873.92	-2.35	3.71
218	LNALEPDHRVESEGGL	16	1735.87	0.688	4.146
219	AIKKKDEIERVAKANR	16	1869.2	1.25	10.786
220	IVPEPIPA	8	835.011	0.838	3.85
221	PVNPPGPF	8	823.947	-0.413	6.1
222	KVPPLVVL	8	864.139	1.638	9.7
223	LVVLPVQNDGSTGLHW	16	1734.97	0.344	5.292
224	QWPPDVHL	8	991.114	0.788	5.292
225	EWVFDGEL	8	994.069	0.125	3.425
226	PVPRPPHL	8	912.103	0.763	10.552
227	IDDDGIPR	8	899.956	-1	3.826
228	AAKELEQLNREKDRDF	16	1962.15	-1.706	4.673
229	KAKDTTMVDVPVKVPY	16	1791.14	0.256	9.22
230	NLHPGDAQRIPAGTTY	16	1710.87	-0.812	7.543
231	VMDKPNGPVWRISGED	16	1800.02	0.831	4.37
232	WIAKNSWGEDWGEDGY	16	1912.99	-1.319	3.738
233	HPRPHQPHQKEEEKHEW	17	2229.4	-3.047	6.967
234	SQEQLKKPQGEQDPIKY	17	2016.24	-1.976	6.575
235	RHNIGQTSSPDIYNPQA	17	1898.02	1.271	7.543
236	DMTIGGQPAGRIVMELY	17	1851.17	0.165	4.184
237	IAKNSWGEDWGEDGYIW	17	2026.15	-0.976	3.738
238	GRKPTRKDPNSESRSND	17	1944.05	-2.676	10.759
239	VMDKPNGPVWRISGEDL	17	1913.18	0.559	4.37
240	GAKKVIISAPSKDAPMF	17	1760.12	0.171	10.507
241	ATVNVAKPKPNNTVAVF	17	1770.06	0.124	10.805
242	GSKDNVISQIPSQVQEL	17	1842.04	-0.476	4.184
243	VNPRVPEVVAMPELENL	17	1906.23	0.076	3.98
244	TAPAMRKPQQEEDDDDE	17	1975.03	-2.253	3.71
245	DMTIGGQSAGRIVMELY	17	1841.13	0.212	4.184
246	KEPGSSAGELVVIALAH	17	1677.92	0.459	5.493
247	NLKSAAAPF	9	918.06	0.244	9.7
248	FPFPAPPHF	9	1056.23	0.067	7.55
249	ESEDSELAR	9	1035.03	1.611	3.778
250	DRHAKVHRF	9	1165.32	1.556	11.48
251	IRETAPASE	9	973.051	0.722	4.258
252	IPVNKPGAF	9	942.126	0.256	9.7
253	VDLSVIEILSRHASDEVY	18	2045.28	0.311	4.104
254	PDNNENLAL	9	999.045	0.978	3.55
255	NALEPDHRVESEGGLIQT	18	1965.11	-0.806	4.146
256	VLAPPDAHF	9	966.105	0.5	5.292
257	GEPDNVVAF	9	947.012	0.056	3.55
258	VSANVLPLL	9	925.136	1.744	6.1
259	TATAHNTAA	9	856.891	-0.178	7.55
260	VPFEEAKKF	9	1094.28	-0.533	6.531
261	VLPPHFDSE	9	1040.14	0.378	4.181
262	ALEPDHVVE	9	1008.1	0.144	3.926
263	LVNVPLVVQ	9	980.216	1.756	6.1
264	LSVEVIAAL	9	914.11	2.2	3.85
265	AGSKDNVISQIPSQVQEL	18	1913.12	0.35	4.184
266	VIDGVGHLF	9	956.109	1.333	5.292
267	VAPVDAHAK	9	907.037	0.178	7.549
268	VLVYPSQAT	9	977.125	0.678	6.093
269	VKELDGPIM	9	1001.21	0.167	4.184
270	RTDGEAALK	9	960.055	-1.011	6.494
271	EDLPIPTAY	9	1018.13	0.233	3.55
272	LVDLNGNHL	9	994.115	0.167	5.292
273	LTGAIEAAH	9	881.984	0.656	5.363
274	VAPADAHPK	9	905.021	-0.467	7.549
275	VELDGPIMF	9	1020.21	0.911	3.55
276	MNPVPQFTSPDYKPSNKL	18	2063.36	-1.061	9.256
277	EDKDFETRVETEGGRIRV	18	2136.31	-1.383	4.385
278	VMDKPNGPVWRISGEDLM	18	2044.37	-0.422	4.37
279	DFVLDNEGNPLENGGTYY	18	2017.09	0.889	3.295
280	FDMTIGGQPAGRIVMELY	18	1998.34	0.311	4.184
281	IDLSVIEILSRHASDEVY	18	2059.3	0.328	4.104
282	IKLPTDILSKISPLPVLK	18	1975.49	0.589	10.507
283	APGPVWTPIQPASKPAEM	18	1877.19	-0.317	6.409
284	LVVEDIDATDSGGPMVPW	18	1901.12	0.233	3.26
285	VVLPVQNDGSTGLHWANL	18	1920.15	0.211	5.292
286	GATVNVAKPKPNNTVAVF	18	1827.11	0.094	10.805
287	TAEKAKEGKDTTLGKLGEL	19	1989.25	0.942	6.645
288	KGGAKKVIISAPSKDAPMF	19	1945.35	0.074	10.803
289	LAGSKDNVISQIPSQVQEL	19	2026.27	0.132	4.184
290	EDKDFETRVETEGGRIRVL	19	2249.47	-1.111	4.385
291	LAGEKDNVVRQIERQVQEL	19	2224.5	-0.779	4.588
292	ALVVEDIDATDSGGPMVPW	19	1972.2	0.316	3.26
293	KEPGSSAGELVVIALAHAF	19	1896.17	0.653	5.493
294	RTGRKPTRKDPNSESRSND	19	2201.34	-2.668	11.479
295	LAGEKDNVVR	10	1100.24	-0.53	6.494
296	LSSRPPDPHQ	10	1133.23	-1.73	7.551
297	IQIDDDGIPR	10	1141.25	-0.7	3.826
298	AGEVDNVVPQ	10	1027.1	0.16	3.55
299	NATEAAVEPY	10	1064.12	-0.45	3.614
300	NKLVEIEEKL	10	1214.42	0.55	4.479
301	NAVFDGELPR	10	1117.23	-0.44	4.184
302	VEISKKVIPE	10	1141.37	0.02	6.531
303	SSRPVDRHPK	10	1178.32	-2.02	11.48
304	VEISKEVIPA	10	1084.28	0.59	4.258
305	LPQDRHVKVH	10	1228.42	-1.12	9.699
306	ERVFDGELPE	10	1190.28	-0.97	3.778
307	DINEEELRPF	10	1261.35	1.25	3.778
308	LAELSEDDIF	10	1151.23	0.19	3.295
309	SRNELDKIIG	10	1144.29	0.73	6.494
310	LFEELNNDLF	10	1253.37	-0.05	3.425
311	LSQVPVDVHQ	10	1121.26	0.03	5.292
312	AISNQGTIPF	10	1047.18	0.31	6.1
313	LAELSEQDIF	10	1164.28	0.19	3.425
314	AELDKQAAPQ	10	1070.17	-1.03	4.184
315	PFELPSEEVG	10	1103.19	-0.41	3.473
316	NALEPDHVVE	10	1122.2	-0.48	3.926
317	SRINELVIPF	10	1187.4	0.59	6.41
318	NGERVFDGEL	10	1135.2	0.85	3.928
319	DGELQEGPVL	10	1056.14	-0.46	3.425
320	EIYQEDLIPR	10	1275.42	0.86	3.928
321	DKIRLGDTDL	10	1145.28	0.79	4.312
322	QFPFPVPPPQ	10	1153.35	-0.52	6.1
323	PFPVPVQPHQ	10	1145.33	-0.54	7.55
324	KGKVGKDTFL	10	1092.3	0.59	10.507
325	LAELSEDDVF	10	1137.21	0.16	3.295
326	AIPVNKPGPF	10	1039.24	0.07	9.7
327	EHLEPNLEPL	10	1190.32	-0.9	3.979
328	SAGEKVKKPF	10	1090.29	0.92	10.507
329	LEHNRSPGYY	10	1235.32	1.63	7.536
330	SSIEGAKEPY	10	1080.16	0.95	4.258
331	HTNPTKPINL	10	1134.3	-1.04	9.702
332	PGSAKDIENL	10	1043.14	-0.71	4.184
333	SPQLENLIDY	10	1191.3	0.56	3.55
334	KIMENQSEEL	10	1220.36	-1.2	3.98
335	TIIPLPVIKE	10	1122.41	1.02	6.409
336	LKNDGTLIPL	10	1083.29	0.23	6.337
337	VAEDELMIIL	10	1145.38	1.4	3.425
338	ALRVPSGTTY	10	1064.21	0.02	9.349
339	LPSYSPYPPM	10	1151.34	0.49	6.087
340	AGKDEDKPDL	10	1087.15	-1.82	4.063
341	APINKIHPHL	10	1139.37	-0.24	9.704
342	GVAPGPVWTPIQPASKPAEM	20	2033.37	0.095	6.409
343	SATGAIEAAHAIATGDL	17	1568.7	0.612	4.181
344	SRYPTSKGAL	10	1079.22	0.84	10.455
345	VVIPTEPPHQ	10	1116.28	0.28	5.363
346	SATGAIEAAH	10	926.982	0.31	5.363
347	IEKNRDKPAQ	10	1198.34	-2.16	9.535
348	KDTAGSPASY	10	996.042	0.94	6.331
349	LINEATQGTY	10	1109.2	0.35	3.85
350	EEPQQKGQSSRPQDRHQKIY	20	2439.63	-2.5	9.257
351	LEDLRIPTAY	10	1190.36	0.12	4.184
352	ETEGGSIIVL	10	1017.14	0.77	3.614
353	NTWKEQHQHDENKPGVIGSM	20	2335.54	1.645	6.503
354	RHNIGQTSSPDIYNPQAGSVT	21	2242.39	0.919	7.543
355	SVIVEISKEQIRA	13	1471.72	0.246	6.532
356	FEEPQQKGQSSRPQDRHQKIY	21	2586.81	-2.248	9.257
357	GKGSEEEQDEREHPRPHQPHQ	21	2507.58	-2.876	5.458
358	SGGIKLPTDIISKISPLPVLK	21	2176.67	0.462	10.507
359	AQKPKPSEGNPQKEGTGSIVF	21	2199.45	-1.152	9.442
360	SSGKLQLNKVDENGTPKPSSL	21	2199.45	1.024	9.442
361	NGVAPGPVWTPIQPASKPAEM	21	2147.48	0.257	6.409
362	HYQPQHQYPLR	11	1466.62	-2.127	9.177
363	IFEEDKDFETRVETEGGRIRVL	22	2638.92	0.786	4.219
364	VNPESQQGSPR	11	1198.26	-1.773	6.41
365	LAIEKDNVVLQ	11	1241.45	0.4	4.184
366	QRPQDRHQVVH	11	1399.54	-2.055	10.401
367	PFELPSEEVLR	11	1315.49	0.4	3.98
368	VASLVYPSVLT	11	1148.37	1.527	6.093
369	VEISKEQIRAL	11	1285.51	0.082	6.532
370	SEISEDSELLR	11	1277.35	-0.8	3.778
371	KDPNSESRSND	11	1248.23	-2.718	4.37
372	EAISNQGTILF	11	1192.33	0.455	3.85
373	LAPIDTKPVTH	11	1191.39	-0.082	7.549
374	FDIELQEGVVL	11	1261.44	0.809	3.425
375	YQEPQESQVLG	11	1277.35	1.236	3.614
376	IRETQPASELL	11	1256.42	0.382	4.258
377	SLVNNDDRVSY	11	1281.35	0.836	4.109
378	SRIELDKGILT	11	1244.45	0.064	6.494
379	NDLGNPDHVEN	11	1223.22	1.655	3.875
380	LAIPVNKPGLF	11	1168.44	0.9	9.7
381	QLIDSHQKILH	11	1331.54	-0.455	7.713
382	AAKDLEDANLL	11	1172.3	0.1	3.876
383	QSIRPQDRHQK	11	1392.54	-2.545	11.48
384	GRVGEVISRTW	11	1259.43	0.255	10.398
385	AGIAAQKSVLY	11	1120.31	0.727	9.298
386	LKVREDENNPF	11	1360.49	1.518	4.426
387	ASGGAQKTVLY	11	1094.23	0.055	9.298
388	AWMTDEEFALE	11	1341.45	-0.318	3.332
389	RYEGDEINVLF	11	1354.48	-0.445	3.928
390	FLKNDGTLVPL	11	1216.44	0.436	6.337
391	PAMRKPQQEED	11	1328.46	-2.309	4.426
392	RLIDLRIPTAY	11	1330.59	0.209	9.348
393	WDIIPIVPILV	11	1277.61	2.055	3.75
394	IGENKDAMVGW	11	1219.38	-0.336	4.184
395	LTLPDQEKVLW	11	1341.57	-0.182	4.184
396	SVDLPGLKKEDVKVEVEDGRVL	22	2424.78	-0.364	4.355
397	KSVSQNVLPLL	11	1197.44	0.518	9.7
398	ATIAAQKTVLY	11	1178.39	0.709	9.298
399	GNKLKEIEELL	11	1285.5	0.573	4.479
400	IRINQHSVFPL	11	1323.56	0.245	10.552
401	ATITAQKSKLY	11	1223.43	0.264	10.248
402	GVIEGKMMELL	11	1219.52	0.764	4.258
403	VVSKNKPLVVQ	11	1210.48	0.309	10.805
404	TGLGELGQVVL	11	1085.27	0.991	3.85
405	KDIGADWDILY	11	1308.45	0.218	3.826
406	SATGAIEAAHA	11	998.06	0.445	5.363
407	SPNELDKGIGL	11	1142.27	0.5	4.184
408	GAIDKAIIAIL	11	1097.36	1.764	6.337
409	DVIGDPIRNGF	11	1202.33	0.127	4.109
410	TGLGELGEVVL	11	1086.25	0.991	3.614
411	AGIAAQKTVLY	11	1134.34	0.736	9.298
412	AAQKAKETVLY	11	1221.42	0.309	9.256
413	ASITAQTSVLY	11	1153.3	0.755	6.093
414	KPIQEEDDVLE	11	1314.41	1.273	3.638
415	SPRHFDSEVVF	11	1319.44	-0.355	5.454
416	RSIRPQDRHQK	11	1420.6	-2.636	12.223
417	KSSIRPDIVNF	11	1275.47	-0.236	9.695
418	AIKEESEGKLK	11	1231.41	-1.209	6.608
419	GPIGRDPESVL	11	1139.27	0.345	4.184
420	TAISLDFPALW	11	1233.43	1	3.75
421	NDVYLPRDEAF	11	1338.44	-0.8	3.876
422	VNPDKKKDLLV	11	1268.52	-0.709	9.442
423	DKIRLGDTVLF	11	1276.5	0.236	6.449
424	RHNIGQTSSPDIYNPQAGSVTTA	23	2414.57	0.791	7.543
425	GGIKLPTEVISTIMPLPVVKELF	23	2482.06	0.852	6.531
426	EVVFDGPLQEGR	12	1345.47	0.492	3.928
427	LVVLQDPHQKIR	12	1445.73	0.267	9.697
428	SVAELDPQAARQ	12	1284.39	-0.625	4.184
429	IGINAENNQRNF	12	1389.49	1.025	6.41
430	VVVPDNNENLRL	12	1381.55	0.283	4.184
431	AIGINAENNQRN	12	1313.39	-1.108	6.41
432	LVRPQDRHQKVH	12	1512.74	1.6	11.48
433	QVLQDSHQKIRH	12	1488.67	-1.425	9.699
434	RKPQQEEDDDDE	12	1503.46	-3.458	3.71
435	LSLVNNDDRDSY	12	1410.46	-1.092	3.826
436	VVPESQQGSPRV	12	1282.42	0.633	6.41
437	RVETEGGSIRVL	12	1315.49	0.133	6.533
438	LGVINEATQGTY	12	1265.38	0.025	3.85
439	IFVVDKDFETRV	12	1467.68	0.258	4.37
440	NNKQELDERARQ	12	1500.59	-2.65	6.585
441	EVVKVEVEDGRV	12	1357.53	0.15	4.148
442	LNVLENSLPKPY	12	1386.61	0.342	6.402
443	LRPQDRHQKVHR	12	1569.79	-2.325	12.223
444	NKVVENGTPKPS	12	1269.42	1.25	9.537
445	LDLVLLPLPSHF	12	1363.66	1.275	5.292
446	LNIGQTSSPDIY	12	1307.42	-0.275	3.75
447	YIRETQPASENL	12	1420.54	-1.067	4.258
448	TNRGPGGTATAH	12	1139.19	-1.042	10.552
449	KIMVKAREIKDY	12	1493.83	0.633	10.117
450	SIRINQHSVFPL	12	1410.64	0.158	10.552
451	EGGIKLPRDVIS	12	1283.49	0.133	6.494
452	FPFELPPEERGR	12	1473.65	-1.275	4.479
453	FVVVVSGDQVVA	12	1218.42	1.8	3.75
454	KPVNRIESEGGL	12	1298.46	-0.8	6.532
455	LKVREDENNPFY	12	1523.66	1.5	4.426
456	FLAPIDTKPQTH	12	1367.57	0.483	7.549
457	WANVDPTSTIRL	12	1372.54	0.158	6.339
458	TTVPPHPVQVHT	12	1312.49	0.35	7.714
459	SWNKFVPKQPNM	12	1475.73	1.192	10.805
460	AVKVNIPSSLDN	12	1256.42	0.075	6.337
461	LKDPNSPSRSND	12	1329.39	-2.017	6.449
462	AGEKPNVVRQIE	12	1339.51	-0.808	6.532
463	LVQLNREKDRDF	12	1532.72	-1.317	6.556
464	EYVVIPTEPPHQ	12	1408.57	0.633	4.254
465	SGIIHKIEETLH	12	1376.58	0.158	6.501
466	VVSKNKPLVVQF	12	1357.66	0.517	10.805
467	LEVIARPSRADF	12	1373.58	0.042	6.496
468	LNEIKPSVVAGF	12	1273.49	0.633	6.409
469	IVVVWNPRNPLL	12	1419.73	0.758	10.55
470	VFDGELPEGRVL	12	1330.5	0.117	3.928
471	SVVNVIPQIPSQ	12	1280.49	0.525	6.1
472	SGGIKLPTDIISKISPLPVLKEIF	24	2566.12	0.562	9.442
473	SRNELDPGIGTI	12	1271.39	0.508	4.184
474	RVNMSDFLESGL	12	1367.54	-0.042	4.184
475	APHVNPISDEYT	12	1342.43	-0.767	4.181
476	HSVQIKDYVPKY	12	1476.69	0.842	9.124
477	IGENKDAMDGWF	12	1382.51	-0.717	3.876
478	VSPRHFDSEVVF	12	1418.57	0.025	5.454
479	AKPEASVTDVDF	12	1278.38	-0.225	3.876
480	VISTIIPLPVIK	12	1292.67	1.8	9.7
481	TTQVPPPSVQVH	12	1289.45	0.383	7.55
482	LAVSGKPNTQGF	12	1218.38	-0.183	9.7
483	TLAIPVPKPGRF	12	1295.59	0.233	11.652
484	NKRVPQLENLVDY	13	1587.8	-0.985	6.488
485	QQQLPDSHQKIRH	13	1614.78	-2.031	9.699
486	SSRVTISSEDKPF	13	1452.58	0.723	6.494
487	DSAPPKIMDKARE	13	1457.66	-1.292	6.554
488	EGKDEDEEEEGHM	13	1533.5	-2.615	3.691
489	AIGINAENNQVNF	13	1403.51	0.138	3.85
490	IFEEDPDFETVVE	13	1568.65	0.369	3.167
491	NQRSPQLQNLVDY	13	1574.71	-1.338	6.332
492	GSVDNVISQIPSQ	13	1343.46	0.077	3.75
493	RQNIGQNSSPDIY	13	1491.58	-1.377	6.332
494	YVVNPDNNENLRL	13	1559.7	0.954	4.184
495	QVPVLVDLNGNHL	13	1417.63	0.369	5.292
496	LAGEPDNVVRQIE	13	1439.59	-0.423	3.928
497	DGKGERKEHDVIY	13	1545.67	-1.762	5.595
498	LEEVPKKKMEKEL	13	1600.93	-1.346	6.664
499	AQGRINEATQGAY	13	1378.46	0.877	6.403
500	IGINAENNQRNFL	13	1502.65	0.654	6.41
501	VNPESQQGSPVVK	13	1368.51	-0.808	6.409
502	QRPVPRHQKVHRF	13	1684.97	-1.754	12.807
503	RHNIGQTSSPDIF	13	1471.59	0.823	7.551
504	QHQVPEEEGGSVL	13	1408.49	-0.9	3.979
505	EEVVVEVEDGVVL	13	1414.57	0.854	3.257
506	TAEVAPEGKDTTL	13	1331.44	-0.531	3.928
507	RESEESEDSELVR	13	1564.58	-1.877	3.874
508	RSQVPQDRHQKVH	13	1614.79	-2.1	11.48
509	STRVETEGGSIVV	13	1333.46	0.138	4.258
510	DGTGERKEWERIY	13	1638.76	-2.008	4.588
511	SAWMTDEEFAREM	13	1602.75	0.823	3.778
512	AQGVPNEATQGTY	13	1335.39	0.869	3.85
513	HVDWRETDKAHIF	13	1653.82	-1.046	6.502
514	EGGIKLPRDVIST	13	1384.6	0.177	6.494
515	TAKVPEEAQRELE	13	1499.64	-1.277	4.189
516	EDLVVQVEENKIL	13	1527.73	0.015	3.778
517	EIFVPELDGPIMF	13	1506.78	0.8	3.425
518	TRVVTEGGRIVVL	13	1398.67	0.8	10.398
519	TLEDVPNQGTIRF	13	1489.65	0.508	4.184
520	VSPVHFDSEVVFF	13	1508.69	0.908	4.181
521	AFSATGAIEAAHA	13	1216.32	0.731	5.363
522	ASDVPIRIGINGF	13	1358.56	0.585	6.339
523	NSIRINQHSVFPL	13	1524.74	0.123	10.552
524	EDVVVEVEDGVVL	13	1400.55	0.854	3.226
525	SGDALRVPSGTTY	13	1323.42	0.377	6.332
526	NLHPGDAQRIPAG	13	1345.48	0.792	7.551
527	SVIVEISKKQIRE	13	1528.81	-0.192	9.535
528	VRNDLENSLPKPY	13	1544.73	1.223	6.488
529	HPEWELPDDAVVY	13	1569.69	0.662	3.737
530	YEGGIKLPVDVIS	13	1389.61	0.446	4.184
531	NVINGGSHAGNKL	13	1280.41	0.408	9.702
532	SPNELDKGIGLVF	13	1388.58	0.115	4.184
533	RVFDGELQEGGVL	13	1418.57	0.069	3.928
534	ITLAIPVNKPGVF	13	1368.68	1.085	9.7
535	SGGIPLPTDIISK	13	1297.51	0.277	6.337
536	GNVVPEIEEKLVR	13	1481.71	0.269	4.479
537	AWMTDEEFAREML	13	1628.84	-0.469	3.778
538	FVDAQPQQKEEGN	13	1489.56	1.662	3.928
539	TTQVPPHSVPVHT	13	1399.57	0.385	7.714
540	VVSVNPPLVVQFQ	13	1425.69	1.008	6.1
541	QVLHPNGGTVVNG	13	1291.43	0.062	7.55
542	FPGSAQDVERLLK	13	1459.66	0.408	6.494
543	AAHAIATGDLVSL	13	1238.41	1.146	5.292
544	SLKVREDENNPFY	13	1610.74	-1.446	4.426
545	NKLPEIEEKLARK	13	1567.85	-1.377	9.44
546	EAVGQTPLFPVIF	13	1417.67	0.985	3.85
547	ERVFDGELQEGVV	13	1476.61	0.277	3.778
548	FPGSAQAVEKLLK	13	1387.64	0.046	9.537
549	APIDTKPQTHAGY	13	1398.54	0.946	7.541
550	QVLHPNGGMVVNA	13	1335.54	0.308	7.55
551	QKPPLQDSHQKIR	13	1574.8	-1.938	10.789
552	VNLNMGSILGPHW	13	1437.68	0.3	7.55
553	TQKTVDGPSAKDW	13	1432.55	-1.338	6.447
554	VVNPDNNENLVLI	13	1452.63	0.162	3.55
555	VKGHEDRDKDDTL	13	1527.61	-2.008	4.592
556	NVISQIPSQVQEL	13	1454.64	0.038	3.85
557	VQSPNELDKGIGL	13	1369.54	0.369	4.184
558	LVVSPNKPLVVWF	13	1497.84	1.146	9.7
559	NPENPSIELGPEF	13	1442.55	0.954	3.473
560	ASQVAKETKDATM	13	1379.55	-0.692	6.493
561	DVQVYPEKGTVAF	13	1452.63	0.092	4.184
562	QKPPLQDSHQKIVH	14	1654.89	-1.407	9.541
563	ERVFDGPLQPGVVL	14	1525.77	0.286	4.184
564	DGVGERKPHDRIYD	14	1656.78	-1.793	5.57
565	STRVETPGGSIRVL	14	1471.68	-0.086	10.398
566	REWWDSIPIVPIRV	14	1766.08	0.007	6.496
567	FAIGINAPNNQRNF	14	1575.75	-0.414	10.55
568	GNKLKPIPPKLVRR	14	1616.03	0.936	12.546
569	QHQQEPPPVGGSVL	14	1472.62	-0.814	5.363
570	AIGINAPNNQRNFL	14	1541.73	0.343	10.55
571	ESVIVPISKEQIRA	14	1568.83	0.114	6.532
572	NKVDENGTPKPSSL	14	1485.61	-1.407	6.493
573	GNKLKPIPPKLARK	14	1559.96	-1.064	11.997
574	ETRVETPGGRIRVL	14	1582.82	-0.543	10.309
575	GPLVNPPSQQGSPR	14	1433.59	-1.129	10.55
576	SVIVEISKPQIRAL	14	1552.88	0.636	9.695
577	VVNPDNNPNLRLIT	14	1578.79	0.386	6.339
578	ERVFDGPLQPGQVL	14	1554.77	0.264	4.184
579	NGTGPRKEYDRIYD	14	1683.8	-2.007	6.542
580	LTLEDVPNQGTIRF	14	1602.81	-0.2	4.184
581	AGSKDNVISQIPSQ	14	1443.58	-0.521	6.337
582	SQRPQDRHQKVHRF	14	1819.02	-2.371	12.223
583	TAEKAKNAKDTTVQ	14	1504.66	-1.3	9.442
584	ATLDAKPRLDLDAP	14	1495.7	-0.429	4.312
585	FPFPRPPHQKEERK	14	1793.06	-2.236	10.774
586	ERVFDGELQEGGVL	14	1547.68	0.314	3.778
587	MVNLNMGSILGPHW	14	1568.87	0.414	7.55
588	QESVIVPISKEQIR	14	1625.89	0.264	6.532
589	AAEKAKNAKDTTVQ	14	1474.63	-1.121	9.442
590	QSGDALRVPSGTTY	14	1451.56	-0.6	6.332
591	FETRVPTEGGRIRV	14	1616.84	-0.614	10.309
592	EFFGPGGRDPESVL	14	1506.63	-0.471	3.928
593	YVVNPDNNENLRLI	14	1672.86	0.564	4.184
594	ANHTYVPSETPAPL	14	1496.64	0.493	5.363
595	ASEASDVAQNTKDY	14	1498.52	-1.1	3.876
596	DGELQPGGVLIVPQ	14	1421.61	0.15	3.55
597	AAEKAKPGKDATVN	14	1399.57	-0.964	9.442
598	GQHQQQPPEGGSVL	14	1461.55	-1.279	5.363
599	KDWVFTDQALPADL	14	1618.81	0.207	3.826
600	LPEGPAVKIGENKD	14	1466.65	0.821	4.426
601	ANHTYVPSPTPAAL	14	1438.6	0.114	7.542
602	VVQSPNPLDKGIGL	14	1436.67	0.093	6.337
603	NGERVFDGPLQEGR	14	1573.68	-1.321	4.426
604	DGTGERKEWPRIYD	14	1721.85	-1.979	4.545
605	TPANWKPGDPVVIT	14	1494.71	0.264	6.337
606	WEAKGQTPLFPRIF	14	1689.98	0.35	9.695
607	DLANNKVAKVLITY	14	1561.84	0.271	9.256
608	ESVIVPISKKQIRE	14	1625.93	0.293	9.535
609	IKPPTDPQQQRPQE	14	1661.84	-2.286	6.494
610	VINEGDANIELVGL	14	1455.63	0.607	3.425
611	LDLEPNKIVDFIKF	14	1691	0.214	4.37
612	EDLKVQVPPNKILQ	14	1620.91	0.571	6.493
613	ELDKGIGTIISSPY	14	1492.69	0.029	4.184
614	SDDINKQHDTTNAY	14	1621.64	-1.807	4.308
615	VGDADDITSSLAHA	14	1371.42	0.107	3.825
616	VVLPVQNDGSTGLH	14	1435.6	0.186	5.292
617	SSIRINQHSVFPPN	14	1595.78	0.557	10.552
618	SAIDNAHIDQWIDF	14	1644.76	-0.179	3.825
619	RNSWPPPNPHIGIN	14	1598.78	1.264	10.552
620	SGGIKLPTDIISKI	14	1441.73	0.414	9.537
621	IYPAVDPLPSTSRM	14	1546.8	0.014	6.332
622	REGDLIAVPTGVAW	14	1483.69	0.343	4.184
623	GHPEWPLPDPAGKY	14	1563.73	-1.279	5.454
624	ITGDHGVTVTETTF	14	1477.59	0.086	4.181
625	ALEPDHRVESEGGL	14	1508.61	-0.807	4.146
626	AQVELRDEHGNPVE	14	1592.68	1.193	4.146
627	KVINPRFGIVEGLM	14	1572.93	0.579	9.695
628	YIVTPPKPGPDSEL	14	1512.72	0.571	4.184
629	SLAKDIGADWDIDY	14	1581.7	0.35	3.662
630	STGHVPSSGGESSA	14	1259.25	0.586	5.363
631	IGKDPTPQTAIDNL	14	1482.65	0.593	4.109
632	AFPGSAQAVEKLLK	14	1458.72	0.171	9.537
633	SRNELDKGIGTIIS	14	1502.69	-0.336	6.494
634	YFVDAQPQPKEEGN	14	1621.72	1.5	3.928
635	DTEGRYVPANIENI	14	1590.71	-0.786	3.928
636	EEVKVPVEPGRVLQ	14	1578.83	0.386	4.479
637	QESVIVEISKKQIRE	15	1786.06	-0.633	6.609
638	EDKDFPTRVPTEGGR	15	1703.83	-1.687	4.545
639	SIGEKLGDAKQREEL	15	1672.86	1.167	4.588
640	QESVIVPISKPQIRA	15	1664.97	0	9.695
641	ESVIVPISKPQIRAL	15	1649.99	0.487	9.695
642	NGERVFDGPLQEGRV	15	1672.82	0.953	4.426
643	VIKPPTDPPPPRPQE	15	1667.93	1.473	6.494
644	NARPQGVNNNGPPKL	15	1575.75	-1.447	11.652
645	EPKQKKKMEKELINL	15	1856.25	1.64	10.211
646	KSSSPKTISSEDKPF	15	1637.81	-1.287	9.442
647	LAGSKDNVISQIPSQ	15	1556.74	0.233	6.337
648	LNKVDPNGTPKPSSL	15	1566.78	0.933	9.537
649	ARDDDVKNDSELQHW	15	1827.88	-1.867	4.191
650	FETRVPTEGGRIRVL	15	1730	-0.32	10.309
651	FWPAKGQTPLFPRIF	15	1805.15	0.013	11.652
652	GQRDNPHWTSDSKAL	15	1711.81	1.68	7.55
653	GKHQQPPPNEGGSIL	15	1558.71	-1.307	7.55
654	GQHQQPPPEEGGSVL	15	1559.65	-1.3	4.254
655	FVDAQPQQKEEGSKG	15	1647.76	1.547	4.426
656	SKDNVISQIPSQVQE	15	1671.83	0.767	4.184
657	AENKPDNRIPGEIIY	15	1728.92	-1.033	4.426
658	EPFFGPGGRDPESVL	15	1603.75	-0.547	3.928
659	GPTTGDKIRLGDTDL	15	1558.71	-0.78	4.312
660	KEGSSIINTTSVNAY	15	1583.71	-0.327	6.402
661	LQRDDVELVAVNDPF	15	1729.91	0.153	3.699
662	PAVKIGPNKDAMDGW	15	1598.84	-0.6	6.447
663	VKGHPDKDARDTLEM	15	1711.91	-1.367	5.57
664	ITDQKISAIKDIIPL	15	1668.01	0.447	6.447
665	LEEKQKKKMEKELIN	15	1888.25	-1.767	9.32
666	QGQHQQQEEEGGSVL	15	1653.68	1.68	3.979
667	NELDKGIGTIISSPY	15	1606.79	0.207	4.184
668	VVSGDLAQKPVAPED	15	1524.69	0.153	3.876
669	ELAFPGSAQDVERLL	15	1644.85	0.047	3.928
670	AGHPPWELPDDAGKY	15	1652.78	-1.2	4.366
671	IKDYGQQQISGVQAS	15	1621.77	0.673	6.331
672	SKARYDEIVKEVSSY	15	1773.96	0.873	6.57
673	SPDIYNPQAGSVTTA	15	1520.62	0.407	3.75
674	SSAIDNAHIDQWIDF	15	1731.84	-0.22	3.825
675	VVNPDNNENLRLITL	15	1723.95	-0.233	4.184
676	GNIGVLTGDEGEIRL	15	1542.71	0	3.928
677	REGDLIAVPTGVAWW	15	1669.9	0.26	4.184
678	ELISNASDALDKLRF	15	1691.9	0.113	4.37
679	RNSWDPPNPHIGINV	15	1715.89	1.027	7.551
680	DTEGRYVPANIENIF	15	1737.89	-0.547	3.928
681	ILPQPISVSIDAKDF	15	1642.91	0.46	4.109
682	NIGQNSSPDIYNPQA	15	1617.69	-1.113	3.75
683	SVIEILSTHASDEVY	15	1662.81	0.327	3.926
684	TFEDPTTSPVAPATL	15	1546.69	0.067	3.55
685	AKVINDRFGIVEGLM	15	1661.98	0.533	6.494
686	SAKDAAGTVADKSRE	15	1505.61	0.94	6.554
687	ELPDGQVITIGAERF	15	1644.85	0	3.928
688	RSQRPQDRHQKVHRF	15	1975.21	-2.513	12.508
689	PFPRPRQPHQEEEHE	15	1913.04	-2.667	5.477
690	LAGPKDNVVRQIERQ	15	1722.96	0.927	9.69
691	LTDKARDVKERAKDY	15	1808.03	1.673	9.219
692	TVTVPKEEDKKPQVK	15	1726	-1.44	9.373
693	QVFLPADEGVESSIW	15	1676.84	0.187	3.425
694	LPPFPPKSNLDPAIY	15	1668.95	0.287	6.331
695	NSWDPPNPHIGINVN	15	1673.81	-0.96	5.292
696	QESVIVPISKPQIRAL	16	1778.12	0.238	9.695
697	FVDAQPQQKEEISIIR	16	1901.15	0.594	4.426
698	RHNIGQTSSPDIFNPQ	16	1810.94	-1.206	7.551
699	SVIKPPTDPQQQRPIE	16	1833.08	-1.288	6.494
700	KGKHQQPPPNEIPSIL	16	1783.06	1.238	9.539
701	QVVDISGNPIFPIPTY	16	1760.02	0.388	3.75
702	GDHTSPITKEHLEPNL	16	1787.95	-1.125	5.39
703	LKEQQQPQQQEEQPLE	16	1980.12	-2.375	3.82
704	QGQHQQEEEEEGGSVL	16	1783.78	-1.794	3.706
705	AGKDNIVSSLDNVAKE	16	1659.81	-0.438	4.37
706	AGKDEDKQDLIVTPTG	16	1686.84	0.925	4.063
707	ATNPAQSPPGTIRPDF	16	1668.83	-0.819	6.339
708	TNRGPGGTATAHNIRA	16	1593.72	0.887	12.5
709	LEEKQKKKMEKELINL	16	2001.41	-1.419	9.32
710	DGELQEPPVLIVPINF	16	1780.05	0.319	3.425
711	NGERVFDGELQEPPVL	16	1798.97	0.669	3.778
712	NLQSGDALRVPAPTTY	16	1702.88	-0.419	6.332
713	VIKPPTDEQQQRPIEE	16	1907.11	1.575	4.148
714	RNELDKPIGTIISSPY	16	1803.05	0.55	6.488
715	AAKDLEDANRLRDNTF	16	1848.99	1.175	4.499
716	GSKDNVISQIPSQVQE	16	1728.88	0.744	4.184
717	NGERVFDGPLQEPPVL	16	1766.97	0.55	3.928
718	STSDPPPLFDGTTILY	16	1723.9	0.144	3.492
719	RAGHPEWPLPDDAIKY	16	1865.08	-1.1	5.519
720	ANHTYVPSETPAPLVE	16	1724.89	0.388	4.254
721	TPSVIEPSFGIGRIIY	16	1749.04	0.588	6.403
722	VINEGEANIELVIIKE	16	1783.05	0.419	3.82
723	SVHLEDEVSKETSIDY	16	1850.95	-0.769	3.951
724	ITPEKNPQLRDLDVFL	16	1898.19	-0.431	4.37
725	VQELAFPGSAQDVERL	16	1758.95	0.15	3.928
726	VVEEIFSKELDGPIMF	16	1853.16	0.5	3.778
727	KAETKEGGGEEKGMRR	16	1762.96	-2.081	9.438
728	NFREGDLIAVPTGVAW	16	1744.97	0.256	4.184
729	ARDDDVKNDSELQHWW	16	2014.1	-1.806	4.191
730	GLDFTKDDENVNSIPF	16	1810.93	0.644	3.699
731	YVVNPDNNENLRLITL	16	1887.12	0.3	4.184
732	AILPQPISVSIDAIDF	16	1698.98	1.069	3.492
733	GAKDTIGSVDHITTPL	16	1624.81	0.038	5.408
734	TSIGEKLGDAKQREEL	16	1773.96	-1.138	4.588
735	HGGPYPPLSEPDIIVL	16	1703.95	0.081	4.181
736	ITGQVLHPNGGTVVNG	16	1562.75	0.162	7.55
737	VVDLKTSLPEWVRIGF	16	1859.2	0.481	6.494
738	LDNVTGNITPGGPEVL	16	1595.77	0.044	3.55
739	VKKPLDKATEGGREVL	16	1740.03	0.75	9.44
740	VVQSPNELDKGIGLVF	16	1714.98	0.4	4.184
741	VVIKPPTDEQQQRPIEE	17	2006.24	1.235	4.148
742	KEQHQHDENKPGVIISM	17	1990.22	-1.347	6.503
743	DKVVVKVEESRPGAIAE	17	1826.08	0.247	4.588
744	VIKPPTDEQQQRPQEEE	17	2051.2	-2.159	3.987
745	VKIDANEEKNKDLASQY	17	1965.15	-1.306	4.545
746	VRNELDKGIGTIISSPY	17	1862.11	-0.2	6.488
747	TGGNKDQTREEEEETRR	17	2035.07	-2.841	4.414
748	RHNIGQTSSPDIFNPQA	17	1882.02	-1.029	7.551
749	EITPEKNPQLRDLDVFL	17	2027.31	-0.612	4.105
750	IKLPTDILSKISPLPVL	17	1847.31	0.853	9.537
751	VGAKDTIGSVDHITTPL	17	1723.94	0.212	5.408
752	AGSKDNVISQIPSQVQE	17	1799.95	0.594	4.184
753	VGIRVNGVAPGPIWTPL	17	1746.09	0.682	10.55
754	HGGEYPPLSEPDIGVLL	17	1793.01	-0.1	3.926
755	KALVTDADNVIPKAVDA	17	1739.99	0.235	4.312
756	VVQSRNELDKGIGTIIS	17	1829.08	0.012	6.494
757	IEEVWNDRNPLLPSDPY	17	2057.25	-1	3.738
758	GEITAIDIKEGQKELPY	17	1904.15	-0.624	4.148
759	FVDAQPQQKEEGSKGRK	17	1932.12	-1.859	9.44
760	VGAQGAQPKESKTATTY	17	1736.9	-0.9	9.256
761	GSQDNVISQIPSQVQEL	17	1841.99	-0.453	3.55
762	NARPQGVNNNGPPKLSM	17	1794.02	1.212	11.652
763	VAILEQPISVSIDAKDF	17	1845.12	0.647	3.876
764	EEQQRESEESEDSELRR	17	2136.13	-2.771	3.926
765	VSLPGVLPVASGGIHVW	17	1688	1.212	7.55
766	RNSWDPPNPHIGINVNS	17	1917.07	1.159	7.551
767	VEDLPEGPAVKIGENKD	17	1809.99	0.841	3.952
768	TVVQSPNELDKGIGLVF	17	1816.08	0.335	4.184
769	VEQLEGKEKKQMERELM	17	2105.45	1.5	4.74
770	NVTVPKVEKKPENKNVRQ	18	2107.44	1.567	10.794
771	ASQVAKETKDKTMEKAGE	18	1951.18	-1.344	6.645
772	TAEVAKNAKDTTVQKAGE	18	1861.04	0.894	6.582
773	SVIVPPTDEQQQRPQEEE	18	2109.23	1.633	3.672
774	VIKPPTDEQQQRPQEEEE	18	2180.31	-2.233	3.874
775	VGLVEQQQEQQQEEQPLE	18	2139.26	1.556	3.29
776	DKVVVKVEESRPGAIAET	18	1927.18	-0.272	4.588
777	AAKVIGDINRTNERDEGY	18	2021.17	-1.106	4.545
778	GDHVSQITKEHLEPNLEG	18	2003.16	-1.05	4.575
779	AAEVAKNAKDTTVQKAGE	18	1831.01	0.756	6.582
780	FEIVPEKNPQLRDLDVFL	18	2172.51	0.15	4.105
781	FVDAQPQQKEEGSKGRKG	18	1989.17	-1.778	9.44
782	GLSVIKPPTDEQQQRPQE	18	2050.26	1.506	4.426
783	GGAVDTIGSVDHITTPLA	18	1723.9	0.494	4.107
784	LAGSVDNVISQIPSQVQE	18	1884.07	0.1	3.55
785	SQKVKHQQEEENEGGSIL	18	2040.17	1.606	4.621
786	FEEPQQKGQSSRPQDRHQ	18	2182.3	-2.583	7.551
787	VVEVLPEGPAVKIGENKD	18	1893.17	0.133	4.148
788	TAIVETVSSAGEKVKKPF	18	1891.19	0.011	9.442
789	MEEVAKAEQKKIGMTETW	18	2109.44	0.878	4.628
790	PEGPAVKIGENKDAMDGW	18	1914.12	0.911	4.105
791	NSKPNTLLLPNHADADYL	18	1996.21	0.656	5.408
792	NMVDPDEKDSTGNLPSRA	18	1946.08	-1.311	4.063
793	QSRVELDKGIGTIISSPY	18	1963.22	-0.233	6.488
794	KSQVVKEKLGGQHRDAEL	18	2022.29	-1.15	9.442
795	DEDVDKPRPSRPSQGKRE	18	2096.24	-2.494	6.661
796	KALVTDADNVIPKAVDAF	18	1887.16	0.378	4.312
797	IISVEDLIHEIITVGPHF	18	2032.37	0.95	4.417
798	QTSVPDIYNPQAGSVTTA	18	1848.98	0.339	3.75
799	IGQVSSPDIYNPQAGSVT	18	1832.98	0.178	3.75
800	VVNVDNVFEDPDGLKEQL	18	2030.22	0.372	3.606
801	DVTVITGDHGVTVTETTF	18	1892.05	0.3	3.875
802	RLQVSVIVEISKEQIRAL	18	2081.49	0.389	9.69
803	KHMVEGSSIINTTSVNAY	18	1951.18	0.111	7.542
804	MPVVELEVNPDGSAVDNL	18	1898.12	0.15	3.295
805	TFAVVDNIVSSLDNVAKE	18	1921.13	0.433	3.876
806	TKIDVRSGKELEKEPKFL	18	2117.47	-1.028	9.372
807	TAEVAINAIDTTVQIAGEY	19	1979.17	0.411	3.425
808	DKVVVIVEESRPGAIAETL	19	2025.33	0.384	4.148
809	LVVEDLPEGPAVIIGENID	19	1992.25	0.553	3.226
810	LVIVPPTDEQQQRPQEEEE	19	2264.43	1.489	3.589
811	ASQVAIETKDITMEKAGEY	19	2084.33	-0.458	4.148
812	AAEVAIEGKDATVNIMGEY	19	1981.2	0.121	3.778
813	GDHTSQITIEHLEPNLEGL	19	2103.27	-0.611	4.144
814	AAEVAINAKDTTVQIAGEY	19	1964.16	0.1	3.928
815	LPEGPAVIIGENIDAMDGW	19	1997.25	0.221	3.295
816	GSQVAIETIDATIEKAGEY	19	1995.17	0.137	3.778
817	LATVAIEAAHAIATGDLVS	19	1823.08	1.211	4.181
818	IFEEDIDFETRVETEGGRI	19	2255.42	0.653	3.76
819	TVAEVIGSNVVSVAEDELM	19	1962.2	0.768	3.332
820	LKEVIIEQQQEEQPLEVRK	19	2336.67	0.974	4.333
821	FEEVIIKGQSSRPQDRHQK	19	2282.54	1.505	9.535
822	VQSVNILDKGIGTIISSPY	19	2004.31	0.474	6.331
823	LAGVQINVISQIPSQVQEL	19	2036.36	0.574	3.85
824	NIGVTSSPDIYNPQAGSVT	19	1920.06	0.205	3.75
825	SNIVETFEENLGGIGEKRE	19	2121.29	0.832	4.022
826	FPFPRIPHQIEERIQEEDE	19	2409.64	-1.363	4.132
827	NIGVNSSPDIYNPQAGSIT	19	1947.09	0.337	3.75
828	LEEVQIIKMEIELINLATM	19	2230.7	0.716	3.82
829	NIPTKINIGTVEIITPVEL	19	2064.45	0.584	4.258
830	GIISTEDLIHEIITVGPHF	19	2091.39	0.621	4.417
831	LVNVDIVFEDPDGLIEQLL	19	2141.45	0.689	3.196
832	LTNPIIQQTGLGELGQDVL	19	2009.29	0.168	3.55
833	LKSVPIPETNDEPVIVVVG	19	2005.34	0.484	3.928
834	LTGAIIAAHAIATGDLVSL	19	1807.12	1.495	5.292
835	DTVVSAIDAAGTVADISRE	19	1890.03	0.363	3.699
836	LATGAIIAAHAIATGDLVSL	20	1878.2	1.51	5.292
837	LVKGKHQQIIINEGGSILSG	20	2091.44	0.08	9.539
838	LVAKDNAKINVSGADEGARR	20	2084.32	-0.6	9.532
839	GVTVVPGGTGGKSLIAQQHL	20	1919.21	0.33	9.702
840	LVIQQQEQQQEEQPLEVRKY	20	2513.79	1.465	4.189
841	NIGQNSSPDIYNPQAGSITT	20	2077.19	0.74	3.75
842	TPANWKPGDPVVITPDVTNE	20	2150.37	-0.615	3.876
843	LVQSRNILDKGIGTIISSPY	20	2174.53	0.205	9.297
844	PVPRQPHQVVVHEQKVVHEW	20	2428.78	-0.8	7.81
845	FPFPRPPHQVVVRKQVVDED	20	2389.74	0.67	7.551
846	IVQTSSPDIYNPQAGSVTTA	20	2049.22	0.12	3.75
847	GVIKLPTEVISTIMPLPVVK	20	2134.69	1.055	9.537
848	DNQSEQLEGKVKKQMERELM	20	2420.74	1.665	4.707
849	DLPEGPAVKIGVNKDAMDGW	20	2112.39	-0.42	4.063
850	QVEDRAVAAAKVAAKVLVQL	20	2079.47	0.655	9.535
851	LVDVTDITGDHGVTVTVTTF	20	2090.32	0.67	3.825
852	GLPVIKPPTPPQQQRPQPEEE	21	2365.67	1.557	4.479
853	EILEPNLPGLTVDEAIQPKRL	21	2345.72	0.243	4.148
854	LEPGQSTPPSAQSGKDNPQGF	21	2142.27	-1.295	4.184
855	GIPSQKGPHQQEEENEGPIIL	21	2300.51	1.171	4.187
856	VIPEGEANIELVGIKEQPQRQ	21	2347.65	-0.614	4.189
857	LIPEDLPPGPAVKIGENKDAM	21	2204.57	0.295	4.105
858	RIPIGQTSSPDIFNPQAPIIT	21	2265.59	0.057	6.339
859	EDPPEGPAVKIGENKDAPIGW	21	2219.44	-0.976	3.952
860	TIVQSRNPLDKGIGTIISIPY	21	2285.67	0.157	9.297
861	NIPQNSSPPIYNPQAGSITTA	21	2170.36	0.586	6.093
862	NIPQTSSPPIYNPQAGSVTTA	21	2143.34	-0.467	6.093
863	RINIGQNPSPDIYNPQAPIIT	21	2321.62	0.514	6.332
864	LIPPLSVIKPPTDEQQQRPQE	21	2413.76	-1.029	4.426
865	LEQAKESPITAGKDTPQPIIE	21	2265.55	0.729	4.148
866	MIPNELEVNPDGSAVDNLIAF	21	2258.53	0.21	3.295
867	GGPGDKVVVKVEESRPGAIAE	21	2094.35	-0.333	4.588
868	EILEPNLEGLTVDEAIQNKRVF	22	2527.86	0.259	3.987
869	KTAQAKDNAKENVSGADEGAVR	22	2259.42	1.164	6.624
870	PFPRPRQPHQEEEHEQKEEIEW	22	2856.06	-2.468	4.524
871	RHNIGQTSSPDIFNPQAGSIVT	22	2339.55	0.486	7.551
872	VQNIGQNSSPDIYNPQAGSIVT	22	2302.48	-0.418	3.75
873	HNIGQTSSPDIYNPQAGSVTTA	22	2258.39	-0.623	5.292
874	NVTVPKVEKKPENKNVRQIDVV	22	2533.95	0.855	10.33
875	VQGETVVPGGTGGKSLEAQQVL	22	2154.41	0.045	4.258
876	GGLSVIKPPTDEQQQRPQEEEE	22	2494.65	-1.727	3.874
877	KIMDNQSEQLEGKEKKQMEREL	22	2692.05	-1.836	4.801
878	IMDNQSEQLEGKEKKQMERELM	22	2695.07	1.573	4.414
879	VEDLPEGPAVKIGENKDAMDGW	22	2370.62	-0.7	3.815
880	VGHQDVTDITGDHGVTVTETVF	22	2327.49	-0.014	4.06
881	KIMDNQSEQLEGKEKKQMERELM	23	2823.25	1.674	4.801
882	NAAEQHLTNSVEEITAAALERVY	23	2529.75	-0.27	4.187
883	RHNIGQTSSPDIFNPAAGSITTA	23	2355.55	0.37	7.551
884	FPFPRPRQPHQEEEHEAKEEHEW	23	2970.17	-2.343	4.869
885	RQNIGQNSSPDIYNPAAGSITTA	23	2375.54	0.683	6.332
886	PFPRPRQPHQEEEHEAKEEHEWH	23	2960.13	-2.604	5.439
887	LVEDLPEGPAVKIGENKDAMDGW	23	2483.78	0.504	3.815
888	QEEDEDEEQQRESEESEDSELRR	23	2881.78	-2.961	3.615
889	EAGKPLVIEEVEVAPPAAGEVRL	23	2373.73	0.2	4.022
890	LVVEDLPEGPAVKIGENKDAMDGW	24	2582.91	0.308	3.815
891	VKGGLSVIKPPTDEQQQRPQEEEE	24	2721.96	1.571	4.133
892	PFPRPRQPHQEEEHEQKEEHEWHRY	25	3336.55	-2.84	6.065
893	LVVEDLPEGPAVKIGENKDAMDGWY	25	2746.08	0.348	3.815
894	LNNAAEQHLTNSVEEITQQQLERVY	25	2928.16	0.872	4.187
895	QEQGGHQSQKGKHQQEEENEGGSIL	25	2762.85	-2.06	4.723
896	LQKIMDNQSEQLEGKEKKQMERELM	25	3064.54	1.528	4.801
897	LQETVHQAQKETATKAQKDISETRY	25	2904.19	-1.376	7.541
898	ETIAEIAETTKVIVAGEGEKEIIVK	25	2671.08	0.196	4.162

[truncated: 2 more sheets: Figure S2-D, Table S3]
